23 <sup>10</sup>Department of Population Health Sciences, Albany College of Pharmacy and Health  
24 Sciences, Albany, NY

25

26 \*equal contribution

27 #Address correspondence to Anton M. Sholukh, [asholukh@fredhutch.org](mailto:asholukh@fredhutch.org) and Lawrence  
28 Corey, [lcorey@fredhutch.org](mailto:lcorey@fredhutch.org)

29

## 30 **ABSTRACT**

31 Determinants of protective immunity against SARS-CoV-2 infection require the development of  
32 well-standardized, reproducible antibody assays to be utilized in concert with clinical trials to  
33 establish correlates of risk and protection. This need has led to the appearance of a variety of  
34 neutralization assays used by different laboratories and companies. Using plasma samples  
35 from COVID-19 convalescent individuals with mild-to-moderate disease from a localized  
36 outbreak in a single region of the western US, we compared three platforms for SARS-CoV-2  
37 neutralization: assay with live SARS-CoV-2, pseudovirus assay utilizing lentiviral (LV) and  
38 vesicular stomatitis virus (VSV) packaging, and a surrogate ELISA test. Vero, Vero E6,  
39 HEK293T cells expressing human angiotensin converting enzyme 2 (hACE2), and TZM-bl  
40 cells expressing hACE2 and transmembrane serine protease 2 (TMPRSS2) were evaluated.  
41 Live-virus and LV-pseudovirus assay with HEK293T cells showed similar geometric mean  
42 titers (GMTs) ranging 141–178, but VSV-pseudovirus assay yielded significantly higher GMT  
43 (310 95%CI 211-454;  $p < 0.001$ ). Fifty percent neutralizing dilution (ND50) titers from live-virus  
44 and all pseudovirus assay readouts were highly correlated (Pearson  $r = 0.81$ – $0.89$ ). ND50  
45 titers positively correlated with plasma concentration of IgG against SARS-CoV-2 spike and

46 receptor binding domain (RBD) ( $r = 0.63$ – $0.89$ ), but moderately correlated with nucleoprotein  
47 IgG ( $r = 0.46$ – $0.73$ ). There was a moderate positive correlation between age and spike  
48 (Spearman's  $\rho=0.37$ ,  $p=0.02$ ), RBD ( $\rho=0.39$ ,  $p=0.013$ ) and nucleoprotein IgG ( $\rho=0.45$ ,  
49  $p=0.003$ ). ND80 showed stronger correlation with age than ND50 (ND80  $\rho=0.51$  ( $p=0.001$ ),  
50 ND50  $\rho=0.28$  ( $p=0.075$ )). Our data demonstrate high concordance between cell-based  
51 assays with live and pseudotyped virions.

52

### 53 **INTRODUCTION (5500 words)**

54 The coronavirus disease 2019 (COVID-19) pandemic, caused by severe acute respiratory  
55 syndrome coronavirus 2 (SARS-CoV-2), has caused more than 63 million confirmed infections  
56 and over 1.4 million deaths worldwide as of November 30<sup>th</sup>, 2020  
57 (<https://www.worldometers.info/coronavirus>). To minimize virus transmission and reduce  
58 mortality, regulations enforcing mask use and limiting close contact were implemented in many  
59 countries. An initial success of these orders with an observable reduction in cases led to  
60 relaxed social distancing orders and lockdowns. This in turn has been followed by a new surge  
61 of infections, with case rates and mortality exceeding the initial outbreaks. It is clear that the  
62 reopening of society and return to a pre-pandemic lifestyle will be possible only after safe and  
63 efficacious vaccines and therapies are developed and implemented.

64 The efficacy of most licensed vaccines correlates with pathogen-neutralizing antibodies elicited  
65 by vaccination (1). Humans can mount neutralizing antibody (nAb) responses against SARS-  
66 CoV-2 during natural infection (2–5). Epidemiologic data suggest that reinfection rates seem  
67 low, albeit increasing numbers of sporadic reinfections are being reported (6, 7). A crucial

68 unknown at this time is what immune responses are associated with protective immunity.  
69 Recent studies suggest passive infusion of monoclonal antibodies can alter COVID-19 disease  
70 progression. Infusion of convalescent sera is more controversial regarding its efficacy. In order  
71 to determine what constitutes protective immunity in human populations, well-standardized,  
72 reproducible antibody assays are required to establish correlates of risk and protection. The  
73 current study evaluates several assays that are under validation for use to determine  
74 correlates of protection in vaccine studies evaluating immune responses in persons with  
75 symptomatic COVID-19. These assays include a live-virus neutralization assay, which is  
76 notable because work with live SARS-CoV-2 requires Biosafety Level 3 (BSL-3) containment;  
77 something not readily available at many institutions and not easily amenable to high-  
78 throughput experiments.

79 To avoid these barriers and improve assay feasibility, a variety of live-virus neutralization  
80 assays use recombinant SARS-CoV-2 (rSARS-CoV-2) containing GFP or luciferase reporter  
81 genes at the *ORF7* locus of the viral genome (8, 9). These recombinant viruses replicate  
82 similarly to SARS-CoV-2 clinical isolates in vitro and successfully infect primary airway  
83 epithelial cell cultures. A fluorescence-based rSARS-CoV-2 neutralization assay yielded  
84 comparable results to plaque reduction neutralization test (PRNT) in nAb detection from  
85 convalescent patient plasma (8). With a shorter turnaround time (24-48 hours for reporter virus  
86 vs. 3 days for PRNT), rSARS-CoV-2 provides a useful high-throughput platform to study nAb  
87 responses, but still requires a BSL-3 laboratory for assay set up and readout.

88 Reporter assays using pseudotyped viruses, which are restricted to a single round of  
89 intracellular replication, allow experiments to be carried out in BSL-2 environments.

90 Pseudotyped viral particles can be created with two packaging platforms: lentiviral/retroviral

91 and vesicular stomatitis virus (VSV) (10–13). Both packaging systems have been used for  
92 SARS-CoV-2 pseudovirus reporter neutralization assays and have been tested on multiple cell  
93 types expressing the SARS-CoV-2 entry receptor angiotensin converting enzyme 2 (ACE2)  
94 (14–16). Human lung carcinoma Calu-3 cells, colorectal adenocarcinoma Caco-2 cells, and  
95 green monkey kidney epithelial Vero cells were the most susceptible for VSV-pseudovirus  
96 entry (17). Both Calu-3 and Caco-2, but not Vero, cells express endogenous transmembrane  
97 serine protease 2 (TMPRSS2), a protease that facilitates SARS-CoV-2 cell entry; however,  
98 there were no significant differences in VSV-pseudovirus entry between the three cell types  
99 (17). Vero E6 cells have the highest level of ACE2 expression and both Vero and Vero E6 cells  
100 exogenously expressing TMPRSS2 were highly susceptible to SARS-CoV-2 infection (17–19).  
101 HEK 293T cells transfected to express human ACE2 were also developed and tested in  
102 pseudovirus neutralization assays (20).

103 Binding antibody (bAb) assays are an alternative to cell-based SARS-CoV-2 neutralization  
104 assays (15, 21, 22). Major advantages of bAb assays include their cost, speed and safety. The  
105 receptor binding domain (RBD) of the SARS-CoV-2 spike glycoprotein is the major target for  
106 nAbs (23–25), and bAb assays are therefore based on the detection of antibodies that  
107 compete with ACE2 for RBD binding. As opposed to measuring actual virus neutralization,  
108 surrogate bAb assays report percent binding inhibition between RBD and ACE2, which is then  
109 interpreted as percent neutralization. Competitive surface plasmon resonance (SPR) (15) and  
110 ELISA (21, 22) have both been developed for this purpose. While they provide inexpensive  
111 and rapid detection of RBD-targeting nAbs, bAb assays cannot measure neutralization via  
112 non-RBD spike protein epitopes or concerted action of antibodies targeting different epitopes.

113 In the current study, we used plasma samples from convalescent individuals with mild-to-  
114 moderate COVID-19 disease to compare three different SARS-CoV-2 neutralization platforms:  
115 1) a live recombinant SARS-CoV-2 assay, 2) pseudovirus-based assays, and 3) a surrogate,  
116 ELISA-based test. In addition, two different pseudovirus packaging systems and three different  
117 cell lines were characterized. We also examined the correlation between neutralization and the  
118 concentration of SARS-CoV-2 nucleoprotein-, spike- and RBD-specific IgG.

119

## 120 **METHODS**

121 **Study Population & Specimen Collection.** Residents of Blaine County, Idaho  $\geq 18$  years of  
122 age volunteered for study participation by completing a secure online intake form. Study  
123 volunteers were selected for participation using a two-phased approach. In the first phase,  
124 study volunteers were randomly selected for participation after stratification by ZIP code, and  
125 within ZIP code, age, gender and race/ethnicity. In the second phase, all volunteers who were  
126 Blaine County first responders and their families were selected for participation. Selected  
127 volunteers were invited for study participation in May 2020 and sent an electronic consent  
128 statement. Following enrollment, participants completed a questionnaire in REDCap, a secure  
129 software tool, to collect demographic information and symptom histories since January 15,  
130 2020. Appointments for sample collection were scheduled upon survey completion. Blood was  
131 collected into 10 mL vials containing acid citrate dextrose and shipped overnight to the Fred  
132 Hutchinson Cancer Research Center. Plasma was separated by centrifugation at  $1200\times g$  for  
133 15 mins and aliquoted into cryovials. One aliquot was submitted for Architect SARS-CoV-2 IgG  
134 assay (Abbott). Others were heat inactivated for 30 min at  $56\text{ }^{\circ}\text{C}$ , frozen at  $-80\text{ }^{\circ}\text{C}$  and

135 distributed to testing laboratories. Study participants were informed of the qualitative results of  
136 the Abbott IgG Serology assay via email within one week since obtaining test results. This  
137 study was approved by the Fred Hutch Institutional Review Board and all study materials were  
138 provided in both English and Spanish.

139 **Protein antigens.** A recombinant form of a synthetic construct (SARS\_CoV\_2\_ectoCSPP  
140 (26); GenBank: QJE37812.1) of the spike (S) glycoprotein from SARS-CoV-2 Wuhan-Hu-1  
141 was produced in human HEK293 cells (FreeStyle™ 293-F Cells, ThermoFisher, Waltham, MA)  
142 using a lentivirus expression system (27) and purified by nickel affinity and size-exclusion  
143 chromatography. Purity and solution monodispersivity were confirmed by comparative  
144 reduced/non-reduced PAGE, analytical size-exclusion chromatography, and static/dynamic  
145 light scattering on Uncle (Unchained Labs, Pleasanton, CA) and showed uniform trimerization.  
146 The recombinant protein was modified by replacing the native leader sequence with a murine  
147 Igk leader, removing the polybasic S1/S2 cleavage site (RRAR to A), stabilized with a pair of  
148 proline mutations (2P), and incorporating a thrombin cleavage site, a T4 foldon trimerization  
149 domain, a hexa-histidine purification tag, and a C-terminal Avi-Tag (28). After purification, the  
150 protein was sterile filtered and aliquoted in DPBS, no calcium, no magnesium (ThermoFisher).  
151 An analogous RBD-only version of this construct, swapping a TEV protease (29) site for the  
152 Thrombin site, was also produced following identical protocols. Alternatively, SARS-CoV-2  
153 spike glycoprotein was produced as described elsewhere (23). Both spike protein preparations  
154 were tested in binding assay and no difference in recognition by serum and plasma samples  
155 from different convalescent subjects was found. SARS-CoV-2 nucleoprotein was purchased  
156 from GenScript (Piscataway, NJ) and tetanus toxoid from Lonza (Basel, Switzerland).

157 **VSV-pseudovirus.** The codon-optimized sequence of the SARS-CoV-2 spike protein  
158 (YP\_009724390.1) with a truncation of the 19 C-terminal amino acids (D19) was cloned into a  
159 pcDNA3.1(+) vector (ThermoFisher) under control of the human CMV promoter to generate  
160 pcDNA3.1(+)-SARS-CoV-2-D19. The C-terminal truncation leads to a deletion of the ER-  
161 retention signal, localizing the spike protein to the cell surface, which enhances pseudovirus  
162 packaging (30). VSV(G\* $\Delta$ G-luciferase) system was purchased from Kerafast (13, 31). Twenty-  
163 four hours prior infection with VSV(G\* $\Delta$ G-luciferase), 293T cells were transfected with pcDNA-  
164 WuhanCoV-S-D19. Next day, supernatant was harvest, centrifuged for 5 min at 1,000xg,  
165 aliquoted and stored at -80 °C. TCID<sub>50</sub> was measured by infecting Vero cells (catalog number  
166 CCL-81; ATCC) with serial 2-fold dilutions of the prepared pseudovirus.

167 **LV-pseudovirus.** An expression plasmid encoding codon-optimized full-length spike of the  
168 Wuhan-1 strain (VRC7480), was provided by Drs. Barney Graham and Kizzmekia Corbett at  
169 the Vaccine Research Center, National Institutes of Health (USA). The D614G mutation was  
170 introduced into VRC7480 by site-directed mutagenesis using the QuikChange Lightning Site-  
171 Directed Mutagenesis Kit from (catalog number 210518; Agilent Technologies). The mutation  
172 was confirmed by full-length spike gene sequencing. Pseudovirions were produced in HEK  
173 293T/17 cells (catalog number CRL-11268; ATCC) by transfection using Fugene 6 (catalog  
174 number E2692; Promega). Pseudovirions for 293T/ACE2 infection were produced by co-  
175 transfection with a lentiviral backbone (pCMV- $\Delta$ R8.2) and firefly luciferase reporter gene  
176 (pHR'-CMV-Luc) (32). Pseudovirions for TZM-bl/ACE2/TMPRSS2 infection were produced by  
177 co-transfection with the Env-deficient lentiviral backbone pSG3 $\Delta$ Env (kindly provided by Drs  
178 Beatrice Hahn and Feng Gao). Culture supernatants from transfections were clarified of cells  
179 by low-speed centrifugation and filtration (0.45  $\mu$ m filter) and stored in 1 ml aliquots at -80°C.



180 **Detection of IgG antibodies to SARS-CoV-2 using a commercial serologic assay.**

181 Plasma samples were tested at the Clinical Laboratory Improvement Amendments (CLIA)-  
182 certified University of Washington Virology lab using the Architect SARS-CoV-2 IgG assay  
183 (Abbott) under the Food and Drug Administration's Emergency Use Authorization. The assay  
184 is a chemiluminescent microparticle immunoassay that measures IgG antibodies to the SARS-  
185 CoV-2 nucleocapsid protein. Qualitative results and index values reported by the instrument  
186 were used in analyses. Recommended index value cutoff of 1.40 was used for determining  
187 positivity (33).

188 **Luminex SARS-CoV-2 IgG binding antibody assay.** Protein antigens were coupled to the  
189 Bio-Plex Pro Magnetic COOH beads in a ratio of 10  $\mu\text{g}$  of antigen per  $2.5 \times 10^6$  beads in a two-  
190 step carbodiimide reaction. First, beads were washed and resuspended in Activation Buffer  
191 (100 mM MES, pH 6) and then incubated with N-hydroxysulfosuccinimide (Sulfo-NHS, catalog  
192 number 24520; ThermoFisher) and 1-ethyl-3-[3-dimethylaminopropyl]carbodiimide-HCl (EDC,  
193 catalog number 77149; ThermoFisher) also dissolved in Activation Buffer for 20 minutes on an  
194 end-over-end rotational mixer at room temperature protected from light. Activated beads were  
195 washed three times in Activation buffer. For coupling, antigen was mixed with activated beads  
196 and reaction was carried out for 2 h on a rotational mixer at room temperature protected from  
197 light. Conjugated beads were washed three times with Wash buffer (PBS, 0.05% Tween-20,  
198 1% BSA, 0.1%  $\text{NaN}_3$ ) and finally resuspended in Wash buffer at  $10^7$  beads/ml. Beads were  
199 stored at 4 °C for no longer than 30 days.

200 Antigen-specific IgG was measured using two replicate dilutions. Beads were blocked with  
201 phosphate buffered saline (PBS; Gibco) containing 5% Blotto (Bio-Rad) and 0.05% Tween-20  
202 (Sigma) and incubated for 1 hour with serially diluted plasma samples. Next, beads were

203 washed 3 times with 0.05% Tween-20 in PBS and incubated with anti-human IgG Fc-PE  
204 (catalog number 2048-09; Sothorn Biotech). After incubation with secondary antibody, beads  
205 were washed and resuspended in PBS with 1% BSA and 0.05% Tween-20 and binding data  
206 were collected on Bio-Plex 200 instrument (Bio-Rad). Median Fluorescence Intensity (MFI)  
207 was measured for a minimum of 50 beads per region. Background was established by  
208 measuring the MFI of beads conjugated to antigens but incubated in Assay buffer. Background  
209 MFI values were subtracted from all readings. We also trialed unconjugated beads and beads  
210 conjugated to a decoy antigen with the same plasma samples used in testing and did not  
211 detect non-specific binding above the assay background described above. Pooled sera from  
212 normal human donors collected in 2015 – 2016 was included as the negative control for  
213 SARS-CoV-2 antigens. For the positive control we used convalescent plasma from a subject  
214 with PCR-confirmed severe COVID-19.

215 An IgG standard curve run in duplicate was used to estimate IgG concentration. Anti-human  
216 IgG Fab-specific (Southern Biotech) was conjugated to the same bead regions used to  
217 conjugate to antigen proteins. IgG-coupled beads were blocked, washed and incubated with  
218 serially diluted human standard IgG (catalog number I4506; Sigma) for 1 h. Standard beads  
219 were washed and incubated with anti-human IgG Fc-PE and MFI was measured as described  
220 above. MFI readings and associated IgG concentrations were fitted to a four-parameter logistic  
221 curve (4PL) using the R packages *nCal* and *drc*. A standard curve for each experiment was  
222 used to obtain the effective concentrations of IgG in serum using the MFI measured with  
223 antigen-coated beads. Since serum samples were also run as a dilution series we used the  
224 median of the estimated concentrations from the dilutions that yielded MFIs between 100 and

225 10,000. Serum with all values above (below) this range were right (left) censored at the  
226 concentration of the minimum (maximum) MFI.

227 **Live SARS-CoV-2 neutralization assay.** Assay was carried out in BSL-3 suite. Vero E6 cells  
228 were seeded at  $2 \times 10^4$  cells/well in a 96-well plate 24 h before the assay. Seventy five pfu of  
229 the recombinant SARS-CoV-2-nanoLuc virus (rSARS-CoV-2-nLuc) (9) were mixed with Ab at  
230 1:1 ratio and incubated at 37°C for 1h. A 8-points, 3-fold dilution curve was generated for each  
231 sample with starting concentration at 1:50. Virus and Ab mix was added to each well and  
232 incubated at 37°C + 5% CO<sub>2</sub> for 48h. Luciferase activities were measured by Nano-Glo  
233 Luciferase Assay System (Promega) following manufacturer protocol using SpectraMax M3  
234 luminometer (Molecular Devices). Percent neutralization was calculated by the following  
235 equation:  $[1 - (\text{RLU with sample} / \text{RLU with mock treatment})] \times 100\%$ .

236 **VSV pseudovirus neutralization assay.** Vero cells (ATCC® CCL-81™) were seeded at  
237  $2 \times 10^4$  cells/well in a black-walled 96-well plates 24 hours before the assay. A 7-point, 3-fold  
238 dilution curve was generated with starting sample dilution at 1:20 in a separate round-bottom  
239 96-well plate.  $3.8 \times 10^2$  TCID<sub>50</sub> of rVSV(G\*ΔG-luciferase) pseudovirus with SARS-CoV-2-D19  
240 spike protein (PsVSV-Luc-D19) was mixed with the plasma dilutions. Plasma-virus mixture  
241 was incubated at 37 °C in 5% CO<sub>2</sub> for 30 minutes. After incubation, plasma-virus mixture was  
242 transferred onto the Vero cells. Cells were then incubated at 37 °C, 5% CO<sub>2</sub> for 18-20 hours.  
243 Luciferase activity was measured by Bio-Glo Luciferase Assay System (catalog number  
244 G7940; Promega) following manufacturer protocol using 2030 VICTOR X3 multilabel reader  
245 (PerkinElmer). Percent virus neutralization was calculated by the following equation:  $[1 -$   
246  $(\text{luminescence of sample} / \text{luminescence of cells+virus control})] \times 100\%$ . All the live virus

247 experiments were performed under BSL-3 conditions at negative pressure, by operators in  
248 Tyvek suits wearing personal powered-air purifying respirators.

249 **LV-pseudovirus neutralization assays.** Neutralization of SARS-CoV-2 Spike-pseudotyped  
250 virus was performed by using lentiviral vectors and infection in either HEK 293T cells  
251 expressing human ACE2 (293T/ACE2.MF) or TZM-bl cells expressing both ACE2 and  
252 TMPRSS2 (TZM-bl/ACE2/TMPRSS2 cells). Both cell lines kindly provided by Drs. Mike Farzan  
253 and Huihui Mu at Scripps). Cells were maintained in DMEM containing 10% FBS, 1% Pen  
254 Strep and 3 ug/ml puromycin.

255 **293T/ACE2 cells pseudovirus assay.** For the 293T/ACE2 assay, a pre-titrated dose of virus  
256 was incubated with serial 3-fold dilutions of test sample in duplicate in a total volume of 150 ul  
257 for 1 hr at 37°C in 96-well flat-bottom black/white culture plates. Freshly trypsinized cells  
258 (10,000 cells in 100 ul of growth medium) was added to each well. One set of control wells  
259 received cells + virus (virus control) and another set received cells only (background control).  
260 After 68-72 hours of incubation, 100 ul of cell lysate was transferred to a 96-well black/white  
261 plate (catalog number 6005060; Perkin-Elmer) for measurements of luminescence using the  
262 Promega Luciferase Assay System (catalog number E1501; Promega). Neutralization titers  
263 are the serum dilution at which RLU were reduced by 50% and 80% compared to virus  
264 control wells after subtraction of background RLUs. MPI is the reduction in RLU at the lowest  
265 serum dilution tested.

266 **ACE2/TMPRSS2 TZM-bl cells pseudovirus assay.** For the TZM-bl/ACE2/TMPRSS2 assay,  
267 a pre-titrated dose of virus was incubated with serial 3-fold dilutions of test sample in duplicate  
268 in a total volume of 150 ul for 1 hr at 37°C in 96-well flat-bottom culture plates. Freshly

269 trypsinized cells (10,000 cells in 100 ul of growth medium containing 75 ug/ml DEAE dextran)  
270 were added to each well. One set of control wells received cells + virus (virus control) and  
271 another set received cells only (background control). After 68-72 hours of incubation, 100 ul of  
272 cell lysate was transferred to a 96-well black solid plate (Costar) for measurements of  
273 luminescence using the BriteLite Luminescence Reporter Gene Assay System (PerkinElmer  
274 Life Sciences). Neutralization titers are the serum dilution at which relative luminescence units  
275 (RLU) were reduced by 50% and 80% compared to virus control wells after subtraction of  
276 background RLUs. Maximum percent inhibition (MPI) is the reduction in RLU at the lowest  
277 serum dilution tested.

278 **SARS-CoV-2 Surrogate Virus Neutralization Test (sVNT).** Assay was performed according  
279 to manufacturer (GenScript) protocol and recommendations as follows. Capture plate was  
280 incubated with plasma samples diluted 1:10, washed and probed with secondary antibody.  
281 Assay was developed via TMB (ThermoFisher) and OD at 450 nm was measured using  
282 SpectraMax M2 reader (Molecular Devices). Positive and negative controls were provided in  
283 the kit. Binding inhibition was determined via the following formula: Inhibition =  $(1 - (\text{OD of}$   
284  $\text{sample} / \text{OD of Negative control})) \times 100\%$ . Percent binding inhibition was interpreted as a  
285 percent neutralization. In order to determine ND50, plasma samples were serially diluted  
286 starting from 1:10 and assay was performed as described above.

287 **Statistical Analysis and Visualization.** Neutralization titers were defined as the plasma  
288 dilution that reduced relative luminescence units (RLU) by 50% or 80% relative to virus control  
289 wells (cells + virus only) after subtraction of background RLU in cells-only control wells. Fifty  
290 and 80 percent neutralization titers (ND50 and ND80) were estimated using the *nCal* and *drc*  
291 packages in R. RLU was first transformed to neutralization using the formula  $\text{neut} = 1 -$

292  $([RLU_{\text{sample}} - \text{bkgd}] / [RLU_{\text{VO}} - \text{bkgd}])$ . The neutralization vs. dilution curve was then fit with a  
293 4PL model that was used to estimate the dilution at which there would be 50% or 80%  
294 neutralization. For samples with all dilutions having <50% neutralization the result was right  
295 censored at the highest concentration. Patient demographic information (sex and age) was  
296 extracted from a RedCap survey database. Abbott assay results (including index value) were  
297 extracted from the laboratory information system (Sunquest Laboratory).

298 Correlations were estimated between pairs of neutralization or binding antibody readouts using  
299 Pearson's correlation coefficient ( $r$ ); measures in units of neutralization and IgG concentration  
300 were logged prior to estimating correlation. Log-transformed ND50 values and IgG  
301 concentrations were approximately normally distributed with few outliers and a low level of  
302 censoring, justifying use of Pearson's correlation and linear regression. Left censored values  
303 were given a value of half the level of detection, which corresponded to the first dilution for  
304 each neutralization assay. Student's  $t$  test was also on log-transformed values. Association of  
305 neutralization and IgG concentration with age and BMI were conducted using Spearman's  
306 rank-based correlation and Wilcoxon's rank-sum tests were used to compare neutralization  
307 and IgG in two groups of individuals (e.g. gender, presence of symptom score >2). Statistical  
308 significance was determined based on a p-value < 0.05.

309

## 310 **RESULTS**

311 **Cohort characteristics, demographics, survey participation, and serology clinical**  
312 **testing.** A total of 1,359 email invitations were sent to 2,655 phase 1 study volunteers and 63  
313 phase 2 volunteers. Among phase 1 and 2 volunteers invited to participate, 973 (72%) and 53

314 (84%) people consented and completed the enrollment survey. Of these, 967 participants  
315 presented for specimen collection between May 4-19, 2020, and 222 (22.8 %) with blood  
316 drawn had IgG antibodies to SARS-CoV-2 nucleoprotein according to the Abbott Architect test  
317 (index value  $\geq 1.40$ ). Out of these, we randomly selected forty positive samples to evaluate  
318 different platforms of SARS-CoV-2 neutralizing antibody assays. Participants had a median  
319 age of 51.5 years and a range between 23 and 81 years (Table 1). According to the survey,  
320 only one participant reported being hospitalized and four participants (10%) were self-  
321 described as asymptomatic. Among participants reporting different symptoms (Table S1),  
322 57.5% had fever while fatigue (87.5%), cough (72.5%), headache (67.5%) and chills (65%)  
323 were more prevalent. Based on this, our cohort can be described as representing mild-to-  
324 moderate symptomatic infections.

325 **Cell-based assays provided comparable estimates of neutralization activity.** We tested  
326 forty heat-inactivated plasma samples in four different cell-based neutralization assays each  
327 with a different pair of target cells and virus (Table 2): live recombinant SARS-CoV-2 (rSARS-  
328 CoV-2-nLuc) with Vero E6 cells, a lentivirus pseudotyped by SARS-CoV-2 spike (LV-  
329 pseudovirus) with HEK 293T cells expressing human ACE2 (293T/ACE2) or TZM-bl cells  
330 expressing both ACE2 and TMPRSS2 (TZM-bl/ACE2/TMPRSS2) and a vesicular stomatitis  
331 virus (VSV) pseudotyped by SARS-CoV-2 spike (PsVSV-Luc-D19) with Vero cells; a fifth  
332 binding neutralization assay using competitive ELISA to assess inhibition of binding of hACE2  
333 and SARS-CoV-2 RBD.

334 Fifty percent neutralizing dilution (ND50) is a standard numerical parameter to compare virus-  
335 neutralizing potency between different samples and studies. To reflect the ultimate capacity of  
336 serum antibodies to neutralize virus both ND50 and ND80, the dilutions at which 50% and 80%

337 neutralization is observed, are used together. We serially diluted plasma samples to generate  
338 titration curves and estimated ND50 and ND80 relative to positive and negative controls (Fig.  
339 S1–S3). All four cell-based neutralization assays performed comparably and generated  
340 titration curves necessary for ND50 and ND80 estimation using a four-parameter logistic model  
341 (Fig. S1–S3). On average, the slope parameter for neutralization curves with rSARS-CoV-2-  
342 nLuc was higher compared to other assays (slope B=3.3 vs. 0.6, 1.4, 1.5 for LV-pseudo/293T,  
343 LV-pseudo/TZM-bl and VSV-pseudo/Vero, respectively; all  $p < 0.001$ ). Geometric mean ND50  
344 from the assay with rSARS-CoV-2-nLuc (141, 95% CI 94-213) did not differ ( $p=0.2$ ) from the  
345 LV-pseudo/293T assay (178, 95%CI 112-283; Fig. 1A, Fig. S4A). However, the LV-  
346 pseudo/TZM-bl assay showed significantly lower geometric mean ND50s compared to LV-  
347 pseudo/293T (Fig. 1A, Fig. S4A). The VSV-pseudo/Vero assay produced significantly higher  
348 ND50 values (geometric mean ND50 of 310, 95%CI 211-454) compared to both the SARS-  
349 CoV-2/VeroE6 assay and the two LV-pseudovirus assays (Fig. S4A) suggesting that it is  
350 easier to neutralize VSV-based pseudovirus in Vero cells compared to other approaches.

351 The assay platforms also differed in their capacity to detect neutralization. In the live-virus  
352 assay, LV-pseudo/293T and LV-pseudo/TZM-bl neutralization was detectable at the lowest  
353 dilution for 31, 37, and 34 samples, respectively, and therefore permitted estimation of the  
354 ND50; ND50 of the remaining samples was censored at the lowest dilution (Fig. 1A). In  
355 contrast, VSV-pseudo/Vero permitted estimation of ND50 for all 40 samples (Fig. 1A). With the  
356 sVNT, only 31 of 40 samples showed neutralization above 20%, a negative cutoff value  
357 according to the manufacturer's protocol, at the lowest dilution 1:10 (Fig. S3A). To estimate  
358 ND50, we selected 13 of these 31 samples and tested them in serial dilutions (Fig. 1A, Fig.  
359 S3B). Samples were selected to represent different percent neutralization observed at 1:10



360 dilution. The resulting ND50 was significantly lower (29.5 95%CI 18.2-47.9) than in the cell-  
361 based assays, further supporting the conclusion that the surrogate assay had lower sensitivity  
362 compared to the cell-based assays.

363 We used the same 4PL models to estimate ND80 titers. Though ND80 was consistently lower,  
364 the correlation with ND50 was high ranging from Pearson's  $r=0.87$  for the live-virus assay to  
365  $r=0.97$  for the VSV-pseudovirus assay. Similar to ND50, the ND80 titers also differed among  
366 the assays (Fig. 1B, Fig. S4B) with the SARS-CoV-2/VeroE6 assay reporting the lowest  
367 number of samples with ND80 titers above the limit of detection (24/40) and VSV-pseudovirus  
368 assay showing the highest (39/40). The live-virus assay also showed the smallest difference  
369 between ND50 and ND80 titers (Fig. S5, Table S2), a direct consequence of the steeper  
370 titration curves observed for this assay (Fig. S1A). For pseudovirus-utilizing assays the  
371 difference between ND50 and ND80 was greater and ranged between 2.7 and 4.2-fold. Due to  
372 inability to reach 80% neutralization for the many samples in sVNT, we could not calculate  
373 ND80 (Fig. S3).

374 **Strong correlation among neutralization assays.** Next, we conducted a correlation analysis  
375 of the ND50 and ND80 values derived from each of the five neutralization assays (Fig. 2, Fig.  
376 S6). The live-virus and all three pseudovirus neutralization assays generated ND50 values that  
377 were highly correlated across samples (Pearson  $r = 0.81 - 0.89$ ) with the highest correlation  
378 observed between the two LV-pseudovirus assays (Pearson  $r = 0.89$ , 95% CI [0.81, 0.94],  
379  $p<0.001$ ). ND50 reported by the sVNT showed the lowest correlation with the ND50 values  
380 from the cell-based assays (Pearson  $r = 0.41 - 0.60$ ). In contrast, correlation was greater  
381 between the percent neutralization measured at 1:10 dilution and the outcomes of the cell-

382 based assays (Pearson  $r = 0.73 - 0.80$ ); correlation between ND50 and percent neutralization  
383 at 1:10 dilution was modest ( $r = 0.59$ ).

384 Similar correlation was observed for ND80 outcomes for cell-based assays (Fig. 2B) with  
385 Person's  $r$  ranging between 0.69 – 0.88. Only a few samples showed neutralization greater  
386 than 80% in sVNT (Fig. S3) and thus correlation between sVNT ND80 and other assays was  
387 not estimated.

388 **Plasma concentration of IgG binding antibodies correlated with neutralization potency.**

389 Prior studies of SARS-CoV-2 individuals showed that the serum titer of spike and RBD-binding  
390 IgG antibodies was a correlate of neutralizing potency (14, 34, 35). Using quantitative,  
391 Luminex-based immunoassay, we measured concentration of IgG to SARS-CoV-2 spike, RBD  
392 and nucleoprotein in each of the serum samples; IgG to tetanus toxoid was also measured as  
393 a proxy for overall IgG level and state of humoral immunity (Fig. 1C). The mean concentration  
394 of nucleoprotein-specific IgG measured in the Luminex assay was 7.3  $\mu\text{g/ml}$  (95%CI [5.3, 10])  
395 while the concentration of both spike and RBD IgG was lower at 2.8 (95%CI [1.9 – 4.1]) and  
396 2.1  $\mu\text{g/ml}$  (95%CI [1.4, 3.3]), respectively. Concentration of tetanus-specific IgG was higher  
397 than IgG to SARS-CoV-2 antigens for all individuals (mean 14.5, 95%CI [11.1, 18.9]). Although  
398 Abbott SARS-CoV-2 IgG assay is designed and used for qualitative detection of IgG against  
399 the SARS-CoV-2 nucleoprotein, the instrument reports index values that can be used in  
400 quantitative analyses (Fig. 1D).

401 Pearson correlation analysis revealed that levels of RBD and spike IgG correlated strongly  
402 (Pearson's  $r = 0.89$ , 95% CI [0.81, 0.94]) (Fig. 2A). Nucleoprotein-specific IgG measured in our  
403 Luminex immunoassay was highly correlated with the quantitative index of the Abbott Architect

404 nucleoprotein IgG assay (Pearson's  $r = 0.95$ , 95% CI [0.91, 0.97]). Correlation between levels  
405 of nucleoprotein IgG measured either in Luminex or Abbott assay moderately correlated with  
406 concentration of spike and RBD-specific IgG with Abbott indexes showing higher  $r$  values  
407 (Pearson's  $r$  ranging 0.58 –0.68). There was no significant correlation of tetanus-specific IgG  
408 with SARS-CoV-2 spike, spike RBD or nucleoprotein IgG (all  $p > 0.05$ ).

409 We then examined the relationship between concentration of SARS-CoV-2 IgG and virus  
410 neutralization (Fig. 2, Fig. S7). We found that IgG concentrations to each of the SARS-CoV-2  
411 antigen was positively correlated with neutralization potency measured with each of the  
412 neutralization assays (Pearson's  $r = 0.46 - 0.83$ ; Fig. 2A). The correlation of live-virus  
413 neutralization ND50 with concentration of spike (Pearson  $r = 0.83$ , 95% CI [0.7, 0.91]) and  
414 RBD-specific (0.83 95% CI [0.7, 0.91]) IgG was comparable to the correlations observed with  
415 the other neutralization assays. Nucleoprotein-specific IgG concentration as well as the  
416 quantitative index from the Abbott test were only moderately correlated with ND50 obtained in  
417 cell-based assays, with  $r$  ranging between 0.46 – 0.63. In contrast the correlation of  
418 nucleoprotein-specific IgG was higher with the percent neutralization measured with the sVNT  
419 (Luminex, Pearson's  $r = 0.69$ , 95% CI [0.49, 0.83] and Abbott,  $r = 0.76$ , 95% CI [0.54, 0.85]).  
420 Tetanus-specific IgG did not correlate with any of SARS-CoV-2-associated IgG concentrations  
421 or neutralization titers.

422 **Effect of age, gender and disease symptoms.** We explored if demographic and physiologic  
423 parameters were associated with SARS-CoV-2 specific IgG or neutralization. Previously, body  
424 mass index (BMI), female sex and age were reported to positively correlate with antibody titers  
425 against SARS-CoV-2 (36). We asked whether ND50 titers obtained from each neutralization  
426 assay correlated with age, gender, BMI or self-reported disease symptoms (Table 3). We

427 found a moderate positive correlation between age and concentrations of spike-specific  
428 (Spearman's  $\rho=0.37$ ,  $p=0.02$ ), spike RBD-specific ( $\rho=0.39$ ,  $p=0.013$ ) and nucleoprotein-  
429 specific ( $\rho=0.45$ ,  $p=0.003$ ) IgG. Similarly, there were positive correlations between age and  
430 neutralization titer, though the correlations tended to be higher with ND80 compared to ND50  
431 titer (Fig. 3). For example, the correlation coefficient of age with live-virus neutralization ND80  
432 was  $\rho=0.51$  ( $p=0.001$ ), compared to  $\rho=0.28$  ( $p=0.075$ ) for ND50. No consistent significant  
433 correlations with BMI, gender or symptoms were observed (Table 3).

434

435

## 436 **Discussion**

437 In this study we conducted a detailed comparison of different SARS-CoV-2 neutralization  
438 assays using a set of 40 plasma samples collected from SARS-CoV-2 convalescent individuals  
439 with mild-to-moderate disease involved in a county-wide outbreak of COVID-19. These data  
440 show a high level of congruency among cell-based SARS-CoV-2 neutralization assays. The  
441 50% and 80% neutralization titer readouts of cell-based assays were highly correlated with  
442 each other and with the concentration of RBD and spike-specific IgG. The results of the  
443 ELISA-based sVNT were also positive correlated with the other neutralization assays, however  
444 the correlation was modest in comparison. Though levels of spike-specific IgG were highly  
445 correlated with neutralization, this does not indicate that all spike-specific binding IgG have  
446 neutralization activity, rather it implies that individuals who produce spike-specific binding  
447 antibodies are also likely to make neutralizing IgG. The correlation between nucleoprotein-  
448 specific IgG and neutralization was consistently lower than the correlations of spike and spike

449 RBD-specific IgG with neutralization. This is consistent with known mechanisms of  
450 neutralization, which involve binding and/or blocking the spike:ACE2 receptor binding domain;  
451 the moderate correlations of nucleoprotein-specific IgG with neutralization may indicate that  
452 presence of any SARS-CoV-2 specific IgG is a biomarker of the presence of neutralizing  
453 antibodies as well. The association of age with both the plasma concentration of spike-specific  
454 IgG and neutralization titer suggests that the previously reported association of high  
455 neutralization titer among older individuals may be mediated by higher concentrations of spike  
456 and spike RBD-specific IgG. Whether this is a result of prior infections with seasonal  
457 coronaviruses or an effect of age on the developing immune response to SARS-CoV-2 is not  
458 clear yet.

459 Previously, in a cohort of severely ill COVID-19 patients, deceased individuals were reported to  
460 have higher concentrations of nucleoprotein- than spike- and RBD-specific IgG, and the  
461 opposite scenario was associated with survival (37). In our study, individuals with mild-to-  
462 moderate disease also demonstrated higher concentrations of nucleoprotein IgG compared to  
463 spike and RBD IgG suggesting that the immune response to spike and nucleoprotein differ in  
464 milder forms of disease. Of interest, we did not see any correlation between the neutralizing  
465 potency of plasma and BMI. As our cohort was largely uniform with regard to disease severity,  
466 our study cannot comment on the association between spike and nucleoprotein antibodies and  
467 disease severity.

468 With the set of cell lines used for the assays in this study, we were able to address questions  
469 regarding the influence of proteolytic cleavage of SARS-CoV-2 spike on virus neutralization by  
470 serum antibodies which is important for choosing an assay that would provide more  
471 physiologically relevant outcomes. Although there was no significant difference observed in

472 virus titer at 48 h post infection on the wildtype Vero cells and Vero cells expressing furin, at  
473 the early time point cells expressing protease showed a higher virus titer (9). Proteolytic  
474 cleavage was also shown to be essential for SARS-CoV-2 infectivity on other cell types (9, 17).  
475 Therefore, cell lines expressing TMPRSS2 or a related protease would allow testing for the  
476 possible role of proteolytic cleavage of the spike glycoprotein in virus infectivity. In contrast to  
477 this reasoning, comparison of different cell types used for pseudovirus assays revealed that  
478 the presence of TMPRSS2 is not critical for assay performance. As such, TZM-bl cells  
479 designed to express both ACE2 and TMPRSS2 showed no significant difference compared to  
480 293T cells that do not express TMPRSS2 endogenously and were only expressing ACE2.  
481 TZM-bl cells are widely used in HIV research for neutralization assays with both live viruses  
482 and pseudoviruses due to the assay robustness and reproducibility (38, 39).

483 A neutralization platform based on Vero cells and VSV-pseudovirus demonstrated the highest  
484 sensitivity among assays tested. This could be explained by lower affinity of interaction  
485 between SARS-CoV-2 and simian ACE compared to the human ACE2 and by different density  
486 of spike glycoprotein on the surface of VSV pseudovirus. While increased sensitivity may lead  
487 to overestimation of neutralization potency, it can also be useful for specimens with low  
488 neutralizing activity or when sample volume is limited such as for mucosal secretions and  
489 washes. However, the high correlation between the live-virus assay and Vero/VSV-  
490 pseudovirus assay suggests that data obtained in the latter can accurately reflect the sample  
491 potency to neutralize wildtype SARS-CoV-2.

492 ELISA-based assays have two major limitations: i) inability to account for synergistic action of  
493 antibodies targeting different epitopes; and ii) detection only of antibodies that block interaction  
494 between RBD and ACE2, thus omitting antibodies that neutralize virus via non-RBD sites on

495 the virus glycoprotein (24, 40). For example, synergistic action of antibodies against RBD and  
496 the S2 domain has been reported (41). There are two ways of performing such a surrogate  
497 assay: soluble biotinylated ACE2 competing with serum antibodies for binding to immobilized  
498 RBD or spike, or an opposite version with soluble RBD and immobilized ACE2 (21). Abe et al.  
499 found that an assay with soluble ACE2 and immobilized RBD was more sensitive and yielded  
500 ND50 values that correlated with ND50 titers obtained in the classical cell-based PRNT with a  
501 coefficient of determination of 0.6. The GenScript assay that we have tested in our study  
502 utilizes immobilized ACE2, which likely explains why we were not able to measure ND50 titers  
503 for the majority of samples. Of note, samples used by Abe et al. were also collected from mild-  
504 to-moderate COVID-19 patients. In conclusion, a surrogate assay can be used cautiously as  
505 an alternative to cell-based assays to obtain preliminary qualitative results, to rapidly  
506 distinguish between samples with high and low neutralizing potency, and when a cell-based  
507 assay is not available or reasonably feasible.

508

## 509 **Acknowledgements**

510 We thank Dr. Mindy Minor for critical reading of the manuscript and editorial help, X for  
511 technical assistance, and Sara Thiebaud for assistance with data management and analysis.  
512 This work was funded by: NIAID Service Agreement 225472-99 to RKS, R01AI134878 and  
513 UM1AI068614 to LC, Fred Hutch Evergreen grant to AMS.

514 **References**

- 515 1. Plotkin SA. 2010. Correlates of protection induced by vaccination. *Clin Vaccine Immunol*  
516 17:1055–1065.
- 517 2. Greaney AJ, Starr TN, Gilchuk P, Zost SJ, Binshtein E, Loes AN, Hilton SK, Huddleston  
518 J, Eguia R, Crawford KH, Dingens AS, Nargi RS, Sutton RE, Suryadevara N, Rothlauf  
519 PW, Liu Z, Whelan SP, Carnahan RH, Crowe Jr JE, Bloom JD. Complete mapping of  
520 mutations to the SARS-CoV-2 spike receptor-binding domain that escape antibody  
521 recognition.
- 522 3. Wu F, Wang A, Liu M, Wang Q, Chen J, Xia S, Ling Y, Zhang Y, Xun J, Lu L, Jiang S, Lu  
523 H, Wen Y, Huang J. 2020. Neutralizing Antibody Responses to SARS-CoV-2 in a  
524 COVID-19 Recovered Patient Cohort and Their Implications. *SSRN Electron J*  
525 2020.03.30.20047365.
- 526 4. Huang AT, Garcia-Carreras B, Hitchings MDT, Yang B, Katzelnick LC, Rattigan SM,  
527 Borgert BA, Moreno CA, Solomon BD, Trimmer-Smith L, Etienne V, Rodriguez-  
528 Barraquer I, Lessler J, Salje H, Burke DS, Wesolowski A, Cummings DAT. 2020. A  
529 systematic review of antibody mediated immunity to coronaviruses: kinetics, correlates of  
530 protection, and association with severity. *Nat Commun* 2020 11:1–16.
- 531 5. Long QX, Liu BZ, Deng HJ, Wu GC, Deng K, Chen YK, Liao P, Qiu JF, Lin Y, Cai XF,  
532 Wang DQ, Hu Y, Ren JH, Tang N, Xu YY, Yu LH, Mo Z, Gong F, Zhang XL, Tian WG,  
533 Hu L, Zhang XX, Xiang JL, Du HX, Liu HW, Lang CH, Luo XH, Wu SB, Cui XP, Zhou Z,  
534 Zhu MM, Wang J, Xue CJ, Li XF, Wang L, Li ZJ, Wang K, Niu CC, Yang QJ, Tang XJ,  
535 Zhang Y, Liu XM, Li JJ, Zhang DC, Zhang F, Liu P, Yuan J, Li Q, Hu JL, Chen J, Huang



- 536 AL. 2020. Antibody responses to SARS-CoV-2 in patients with COVID-19. *Nat Med*  
537 26:845–848.
- 538 6. Larson D, Brodniak SL, Voegtly LJ, Cer RZ, Glang LA, Malagon FJ, Long KA, Potocki R,  
539 Smith DR, Lanteri C, Burgess T, Bishop-Lilly KA. 2020. A Case of Early Re-infection with  
540 SARS-CoV-2. *Clin Infect Dis an Off Publ Infect Dis Soc Am*.
- 541 7. To KK-W, Hung IF-N, Ip JD, Chu AW-H, Chan W-M, Tam AR, Fong CH-Y, Yuan S, Tsoi  
542 H-W, Ng AC-K, Lee LL-Y, Wan P, Tso E, To W-K, Tsang D, Chan K-H, Huang J-D, Kok  
543 K-H, Cheng VC-C, Yuen K-Y. 2020. COVID-19 re-infection by a phylogenetically distinct  
544 SARS-coronavirus-2 strain confirmed by whole genome sequencing. *Clin Infect Dis*.
- 545 8. Muruato AE, Fontes-Garfias CR, Ren P, Garcia-blanco MA, Menachery VD, Xie X, Shi  
546 P, Fontes-gar CR, Ren P, Garcia-blanco MA, Menachery VD, Xie X, Shi P. 2020. A high-  
547 throughput neutralizing antibody assay for COVID-19 diagnosis and vaccine evaluation.  
548 *Nat Commun* 11:4059.
- 549 9. Hou YJ, Okuda K, Edwards CE, Martinez DR, Asakura T, Dinnon KH, Kato T, Lee RE,  
550 Yount BL, Mascenik TM, Chen G, Olivier KN, Ghio A, Tse L V., Leist SR, Gralinski LE,  
551 Schäfer A, Dang H, Gilmore R, Nakano S, Sun L, Fulcher ML, Livraghi-Butrico A, Nicely  
552 NI, Cameron M, Cameron C, Kelvin DJ, de Silva A, Margolis DM, Markmann A, Bartelt L,  
553 Zumwalt R, Martinez FJ, Salvatore SP, Borczuk A, Tata PR, Sontake V, Kimple A,  
554 Jaspers I, O’Neal WK, Randell SH, Boucher RC, Baric RS. 2020. SARS-CoV-2 Reverse  
555 Genetics Reveals a Variable Infection Gradient in the Respiratory Tract. *Cell* 1–18.
- 556 10. Li Q, Liu Q, Huang W, Li X, Wang Y. 2018. Current status on the development of  
557 pseudoviruses for enveloped viruses. *Rev Med Virol* 28:1–10.

- 558 11. Carnell GW, Ferrara F, Grehan K, Thompson CP, Temperton NJ. 2015. Pseudotype-  
559 based neutralization assays for influenza: a systematic analysis. *Front Immunol* 6:161.
- 560 12. Zhao G, Du L, Ma C, Li Y, Li L, Poon VKM, Wang L, Yu F, Zheng B-J, Jiang S, Zhou Y.  
561 2013. A safe and convenient pseudovirus-based inhibition assay to detect neutralizing  
562 antibodies and screen for viral entry inhibitors against the novel human coronavirus  
563 MERS-CoV. *Virology* 10:266.
- 564 13. Whitt MA. 2010. Generation of VSV pseudotypes using recombinant DeltaG-VSV for  
565 studies on virus entry, identification of entry inhibitors, and immune responses to  
566 vaccines. *J Virol Methods* 169:365–374.
- 567 14. Yang R, Huang B, A R, Li W, Wang W, Deng Y, Tan W. 2020. Development and  
568 effectiveness of Pseudotyped SARS-CoV-2 system as determined by neutralizing  
569 efficiency and entry inhibition test in vitro. *Biosaf Heal*.
- 570 15. Walker SN, Chokkalingam N, Reuschel EL, Purwar M, Xu Z, Gary EN, Kim KY, Helble  
571 M, Schultheis K, Walters J, Ramos S, Muthumani K, Smith TRF, Broderick KE, Tebas P,  
572 Patel A, Weiner DB, Kulp DW. 2020. SARS-CoV-2 assays to detect functional antibody  
573 responses that block ACE2 recognition in vaccinated animals and infected patients. *J*  
574 *Clin Microbiol* JCM.01533-20.
- 575 16. Hoffmann MAG, Bar-On Y, Yang Z, Gristick HB, Gnanapragasam PNP, Vielmetter J,  
576 Nussenzweig MC, Bjorkman PJ. 2020. Nanoparticles presenting clusters of CD4 expose  
577 a universal vulnerability of HIV-1 by mimicking target cells. *Proc Natl Acad Sci*  
578 202010320.
- 579 17. Hoffmann M, Kleine-Weber H, Schroeder S, Krüger N, Herrler T, Erichsen S, Schiergens

- 580 TS, Herrler G, Wu NH, Nitsche A, Müller MA, Drosten C, Pöhlmann S. 2020. SARS-  
581 CoV-2 Cell Entry Depends on ACE2 and TMPRSS2 and Is Blocked by a Clinically  
582 Proven Protease Inhibitor. *Cell* 181:271-280.e8.
- 583 18. Matsuyama S, Nao N, Shirato K, Kawase M, Saito S, Takayama I, Nagata N, Sekizuka  
584 T, Kato H, Kato F, Sakata M, Tahara M, Kutsuna S, Ohmagari N, Kuroda M, Suzuki T,  
585 Kageyama T, Takeda M. 2020. Enhanced isolation of SARS-CoV-2 by TMPRSS2-  
586 expressing cells. *Proc Natl Acad Sci* 117:7001 LP – 7003.
- 587 19. Ren X, Glende J, Al-Falah M, de Vries V, Schwegmann-Wessels C, Qu X, Tan L,  
588 Tschernig T, Deng H, Naim HY, Herrler G. 2006. Analysis of ACE2 in polarized epithelial  
589 cells: Surface expression and function as receptor for severe acute respiratory  
590 syndrome-associated coronavirus. *J Gen Virol* 87:1691–1695.
- 591 20. Hu J, Gao Q, He C, Huang A, Tang N, Wang K. 2020. Development of cell-based  
592 pseudovirus entry assay to identify potential viral entry inhibitors and neutralizing  
593 antibodies against SARS-CoV-2. *Genes Dis*.
- 594 21. Abe KT, Li Z, Samson R, Samavarchi-Tehrani P, Valcourt EJ, Wood H, Budyłowski P,  
595 Dupuis A, Girardin RC, Rathod B, Colwill K, McGeer A, Mubareka S, Gommerman JL,  
596 Durocher Y, Ostrowski M, McDonough KA, Drebot MA, Drews SJ, Rini JM, Gingras A-C,  
597 Dupuis li AP, Girardin RC, Rathod B, Wang J, Barrios-Rodiles M, Colwill K, McGeer A,  
598 Mubareka S, Gommerman JL, Durocher Y, Ostrowski M, McDonough KA, Drebot MA,  
599 Drews SJ, Rini JM, Gingras A-C. 2020. A simple protein-based SARS-CoV-2 surrogate  
600 neutralization assay. *JCI insight*.
- 601 22. Tan CW, Chia WN, Qin X, Liu P, Chen MI-C, Tiu C, Hu Z, Chen VC-W, Young BE, Sia

- 602 WR, Tan Y-J, Foo R, Yi Y, Lye DC, Anderson DE, Wang L-F. 2020. A SARS-CoV-2  
603 surrogate virus neutralization test based on antibody-mediated blockage of ACE2-spike  
604 protein-protein interaction. *Nat Biotechnol* 38:1073–1078.
- 605 23. Seydoux E, Homad LJ, MacCamy AJ, Parks KR, Hurlburt NK, Jennewein MF, Akins NR,  
606 Stuart AB, Wan YH, Feng J, Whaley RE, Singh S, Boeckh M, Cohen KW, McElrath MJ,  
607 Englund JA, Chu HY, Pancera M, McGuire AT, Stamatatos L. 2020. Analysis of a SARS-  
608 CoV-2-Infected Individual Reveals Development of Potent Neutralizing Antibodies with  
609 Limited Somatic Mutation. *Immunity* 53:98-105.e5.
- 610 24. Rogers TF, Zhao F, Huang D, Beutler N, Burns A, He WT, Limbo O, Smith C, Song G,  
611 Woehl J, Yang L, Abbott RK, Callaghan S, Garcia E, Hurtado J, Parren M, Peng L,  
612 Ramirez S, Ricketts J, Ricciardi MJ, Rawlings SA, Wu NC, Yuan M, Smith DM,  
613 Nemazee D, Teijaro JR, Voss JE, Wilson IA, Andrabi R, Briney B, Landais E, Sok D,  
614 Jardine JG, Burton DR. 2020. Isolation of potent SARS-CoV-2 neutralizing antibodies  
615 and protection from disease in a small animal model. *Science* (80- ) 369:956–963.
- 616 25. Ju B, Zhang Q, Ge J, Wang R, Sun J, Ge X, Yu J, Shan S, Zhou B, Song S, Tang X, Yu  
617 J, Lan J, Yuan J, Wang H, Zhao J, Zhang S, Wang Y, Shi X, Liu L, Zhao J, Wang X,  
618 Zhang Z, Zhang L. 2020. Human neutralizing antibodies elicited by SARS-CoV-2  
619 infection. *Nature* 584:115–119.
- 620 26. Wrapp D, Wang N, Corbett KS, Goldsmith JA, Hsieh CL, Abiona O, Graham BS,  
621 McLellan JS. 2020. Cryo-EM Structure of the 2019-nCoV Spike in the Prefusion  
622 Conformation. *bioRxiv*2020/06/09.
- 623 27. Bandaranayake AD, Correnti C, Ryu BY, Brault M, Strong RK, Rawlings DJ. 2011.

- 624 Daedalus: a robust, turnkey platform for rapid production of decigram quantities of active  
625 recombinant proteins in human cell lines using novel lentiviral vectors. *Nucleic Acids*  
626 *Res*2011/09/14. 39:e143.
- 627 28. Ashraf SS, Benson RE, Payne ES, Halbleib CM, Gron H. 2004. A novel multi-affinity tag  
628 system to produce high levels of soluble and biotinylated proteins in *Escherichia coli*.  
629 *Protein Expr Purif* 33:238–245.
- 630 29. Cesaratto F, Lopez-Requena A, Burrone OR, Petris G. 2015. Engineered tobacco etch  
631 virus (TEV) protease active in the secretory pathway of mammalian cells. *J Biotechnol*  
632 212:159–166.
- 633 30. Ou X, Liu Y, Lei X, Li P, Mi D, Ren L, Guo L, Guo R, Chen T, Hu J, Xiang Z, Mu Z, Chen  
634 X, Chen J, Hu K, Jin Q, Wang J, Qian Z. 2020. Characterization of spike glycoprotein of  
635 SARS-CoV-2 on virus entry and its immune cross-reactivity with SARS-CoV. *Nat*  
636 *Commun* 11:1620.
- 637 31. Zhao X, Howell KA, He S, Brannan JM, Wec AZ, Davidson E, Turner HL, Chiang C-I, Lei  
638 L, Fels JM, Vu H, Shulenin S, Turonis AN, Kuehne AI, Liu G, Ta M, Wang Y, Sundling C,  
639 Xiao Y, Spence JS, Doranz BJ, Holtsberg FW, Ward AB, Chandran K, Dye JM, Qiu X, Li  
640 Y, Aman MJ. 2017. Immunization-Elicited Broadly Protective Antibody Reveals  
641 Ebolavirus Fusion Loop as a Site of Vulnerability. *Cell* 169:891-904.e15.
- 642 32. Naldini L, Blömer U, Gage FH, Trono D, Verma IM. 1996. Efficient transfer, integration,  
643 and sustained long-term expression of the transgene in adult rat brains injected with a  
644 lentiviral vector. *Proc Natl Acad Sci U S A* 93:11382–11388.
- 645 33. Bryan A, Pepper G, Wener MH, Fink SL, Morishima C, Chaudhary A, Jerome KR,

- 646 Mathias PC, Greninger AL. 2020. Performance Characteristics of the Abbott Architect  
647 SARS-CoV-2 IgG Assay and Seroprevalence in Boise, Idaho. *J Clin Microbiol* 58.
- 648 34. Amanat F, Stadlbauer D, Strohmeier S, Nguyen THO, Chromikova V, McMahon M,  
649 Jiang K, Arunkumar GA, Jurczynszak D, Polanco J, Bermudez-Gonzalez M, Kleiner G,  
650 Aydillo T, Miorin L, Fierer DS, Lugo LA, Kojic EM, Stoeber J, Liu STH, Cunningham-  
651 Rundles C, Felgner PL, Moran T, García-Sastre A, Caplivski D, Cheng AC, Kedzierska  
652 K, Vapalahti O, Hepojoki JM, Simon V, Krammer F. 2020. A serological assay to detect  
653 SARS-CoV-2 seroconversion in humans. *Nat Med* 26:1033–1036.
- 654 35. Plebani M, Padoan A, Padoan A, Bonfante F, Zuin S, Cosma C, Basso D, Plebani M.  
655 2020. Clinical performances of an ELISA for SARS-CoV-2 antibody assay and  
656 correlation with neutralization activity. *Clin Chim Acta*.
- 657 36. Gudbjartsson DF, Norddahl GL, Melsted P, Gunnarsdottir K, Holm H, Eythorsson E,  
658 Arnthorsson AO, Helgason D, Bjarnadottir K, Ingvarsson RF, Thorsteinsdottir B,  
659 Kristjansdottir S, Birgisdottir K, Kristinsdottir AM, Sigurdsson MI, Arnadottir GA,  
660 Ivarsdottir E V, Andresdottir M, Jonsson F, Agustsdottir AB, Berglund J, Eiriksdottir B,  
661 Fridriksdottir R, Gardarsdottir EE, Gottfredsson M, Gretarsdottir OS, Gudmundsdottir S,  
662 Gudmundsson KR, Gunnarsdottir TR, Gylfason A, Helgason A, Jensson BO, Jonasdottir  
663 A, Jonsson H, Kristjansson T, Kristinsson KG, Magnusdottir DN, Magnusson OT,  
664 Olafsdottir LB, Rognvaldsson S, le Roux L, Sigmundsdottir G, Sigurdsson A,  
665 Sveinbjornsson G, Sveinsdottir KE, Sveinsdottir M, Thorarensen EA, Thorbjornsson B,  
666 Thordardottir M, Saemundsdottir J, Kristjansson SH, Josefsdottir KS, Masson G,  
667 Georgsson G, Kristjansson M, Moller A, Palsson R, Gudnason T, Thorsteinsdottir U,  
668 Jonsdottir I, Sulem P, Stefansson K. 2020. Humoral Immune Response to SARS-CoV-2

- 669 in Iceland. *N Engl J Med* 1–11.
- 670 37. Atyeo C, Fischinger S, Zohar T, Slein MD, Burke J, Loos C, McCulloch DJ, Newman KL,  
671 Wolf C, Yu J, Shuey K, Feldman J, Hauser BM, Caradonna T, Schmidt AG, Suscovich  
672 TJ, Linde C, Cai Y, Barouch D, Ryan ET, Charles RC, Lauffenburger D, Chu H, Alter G.  
673 2020. Distinct Early Serological Signatures Track with SARS-CoV-2 Survival. *Immunity*.
- 674 38. Montefiori DC. 2009. Measuring HIV Neutralization in a Luciferase Reporter Gene Assay  
675 BT - HIV Protocols, p. 395–405. *In* Prasad, VR, Kalpana, G V (eds.), . Humana Press,  
676 Totowa, NJ.
- 677 39. Seaman MS, Janes H, Hawkins N, Grandpre LE, Devoy C, Giri A, Coffey RT, Harris L,  
678 Wood B, Daniels MG, Bhattacharya T, Lapedes A, Polonis VR, McCutchan FE, Gilbert  
679 PB, Self SG, Korber BT, Montefiori DC, Mascola JR. 2010. Tiered Categorization of a  
680 Diverse Panel of HIV-1 Env Pseudoviruses for Assessment of Neutralizing Antibodies. *J*  
681 *Virol* 84:1439 LP – 1452.
- 682 40. Wec AZ, Wrapp D, Herbert AS, Maurer DP, Haslwanter D, Sakharkar M, Jangra RK,  
683 Dieterle ME, Lilov A, Huang D, Tse L V., Johnson N V, Hsieh C-L, Wang N, Nett JH,  
684 Champney E, Burnina I, Brown M, Lin S, Sinclair M, Johnson C, Pudi S, Bortz R,  
685 Wirchnianski AS, Laudermilch E, Florez C, Fels JM, O'Brien CM, Graham BS, Nemazee  
686 D, Burton DR, Baric RS, Voss JE, Chandran K, Dye JM, McLellan JS, Walker LM. 2020.  
687 Broad neutralization of SARS-related viruses by human monoclonal antibodies. *Science*  
688 eabc7424.
- 689 41. Schäfer A, Muecksch F, Lorenzi JCC, Leist SR, Cipolla M, Bournazos S, Schmidt F,  
690 Gazumyan A, Baric RS, Robbiani DF, Hatzioannou T, Ravetch J V, Bieniasz PD,

691 Nussenzweig MC, Sheahan TP. 2020. Antibody potency, effector function and  
692 combinations in protection from SARS-CoV-2 infection in vivo. bioRxiv  
693 2020.09.15.298067.

694



695 **Figures and Tables**

696 Table 1. Demographic and exposure/symptom characteristics of study participants

| <b>Age</b>                                  | <b>N</b> | <b>%</b> |
|---------------------------------------------|----------|----------|
| 23-40                                       | 8        | 20       |
| 41-50                                       | 11       | 27.5     |
| 51-60                                       | 11       | 27.5     |
| 61-70                                       | 6        | 15       |
| >70                                         | 4        | 10       |
| Median                                      | 51.5     |          |
| Range                                       | 23-81    |          |
| <b>Gender</b>                               |          |          |
| Female                                      | 16       | 40       |
| Male                                        | 24       | 60       |
| <b>Exposures/symptoms</b>                   |          |          |
| Tested positive                             | 8        | 20       |
| Symptomatic contact of known positive       | 9        | 22.5     |
| Symptomatic without confirmation            | 19       | 47.5     |
| Asymptomatic contact of someone symptomatic | 2        | 5        |
| Asymptomatic, no exposures                  | 2        | 5        |
| Travel outside US since 12/1                | 7        | 17.5     |
| <b>Other</b>                                |          |          |
| Essential worker                            | 6        | 15       |
| Lives with children                         | 14       | 35       |

697

698

699 Table 2. SARS-CoV-2 neutralization assay platforms used in the study

| <b>Assay</b>                     | <b>SARS-CoV-2/VeroE6</b> | <b>VSV-pseudo/Vero</b>           | <b>LV-pseudo/293T</b>                             | <b>LV-pseudo/TZM-bl</b>       | <b>Surrogate Virus Neutralization Test (sVNT)</b> |
|----------------------------------|--------------------------|----------------------------------|---------------------------------------------------|-------------------------------|---------------------------------------------------|
| <b>Cell line</b>                 | Vero E6                  | Vero                             | HEK293T                                           | TZM-bl                        | None                                              |
| <b>ACE2 expression</b>           | Endogenous               | Endogenous                       | Engineered                                        | Engineered                    | Recombinant                                       |
| <b>TMPRSS2 expression</b>        | No                       | No                               | No                                                | Engineered                    | N/A                                               |
| <b>Virus used for assay</b>      | rSARS-CoV-2-nLuc         | PsVSV-Luc-D19                    | LV-pseudo                                         | LV-pseudo                     | N/A                                               |
| <b>Virus type</b>                | live recombinant         | VSV(G*ΔG-luciferase) pseudotyped | pCMV-ΔR8.2 lentiviral packaging with pHR'-CMV-Luc | pSG3ΔEnv lentiviral packaging | N/A                                               |
| <b>SARS-CoV-2 strain/isolate</b> | WA-CDC-WA1-A12/2020      | Wuhan-Hu-1                       | Wuhan-Hu-1 (VRC7480)                              | Wuhan-Hu-1 (VRC7480) D614G    | Unknown                                           |
| <b>GenBank</b>                   | MT020880.1               | MN908947.3                       | MN908947.3                                        | MN908947.3                    | N/A                                               |
| <b>position 614</b>              | D                        | D                                | G                                                 | G                             | Unknown                                           |

700

701

702 Table 3. Tests for association of SARS-CoV-2 antibody neutralization and binding with age, BMI, sex and symptoms  
 703

| Assay                                 | Measure | N  | BMI                        | Age                        | Sex (female)                           | No. of symptoms                                |
|---------------------------------------|---------|----|----------------------------|----------------------------|----------------------------------------|------------------------------------------------|
|                                       |         |    | rho <sup>1</sup> (p-value) | rho <sup>1</sup> (p-value) | fold-difference <sup>2</sup> (p-value) | (of 19 surveyed)<br>rho <sup>1</sup> (p-value) |
| SARS-CoV-2/VeroE6                     | ND50    | 40 | 0.20 (0.2107)              | 0.28 (0.0751)              | 0.52 (0.1646)                          | 0.08 (0.6248)                                  |
| VSV-pseudo/Vero                       | ND50    | 40 | 0.33 (0.0376)              | 0.30 (0.0602)              | 0.44 (0.0317)                          | -0.13 (0.4225)                                 |
| LV-pseudo/293T                        | ND50    | 40 | 0.22 (0.1713)              | 0.24 (0.1288)              | 0.52 (0.1467)                          | 0.04 (0.8043)                                  |
| LV-pseudo/TZM-bl                      | ND50    | 40 | 0.38 (0.0164)              | 0.27 (0.0885)              | 0.57 (0.2239)                          | 0.10 (0.5395)                                  |
| sVNT neutralization                   | ND50    | 31 | 0.40 (0.0252)              | 0.43 (0.0160)              | 0.64 (0.2543)                          | 0.16 (0.3896)                                  |
| SARS-CoV-2/VeroE6                     | ND80    | 40 | 0.31 (0.0500)              | 0.51 (0.0007)              | 0.64 (0.2362)                          | 0.04 (0.8239)                                  |
| VSV-pseudo/Vero                       | ND80    | 40 | 0.37 (0.0181)              | 0.32 (0.0466)              | 0.40 (0.0360)                          | -0.11 (0.4967)                                 |
| LV-pseudo/293T                        | ND80    | 40 | 0.36 (0.0212)              | 0.32 (0.0444)              | 0.54 (0.1411)                          | 0.07 (0.6798)                                  |
| LV-pseudo/TZM-bl                      | ND80    | 40 | 0.30 (0.0612)              | 0.29 (0.0738)              | 0.65 (0.3360)                          | 0.10 (0.5347)                                  |
| sVNT neutralization                   | ND80    | 31 | 0.09 (0.6146)              | 0.50 (0.0038)              | 0.81 (0.1806)                          | -0.17 (0.3675)                                 |
| sVNT neutralization (1:10 dilution)   | %       | 40 | 0.33 (0.0374)              | 0.40 (0.0106)              | 0.87 (0.3075)                          | 0.09 (0.5670)                                  |
| Abbott nucleoprotein                  | index   | 40 | 0.29 (0.0719)              | 0.45 (0.0034)              | 0.71 (0.0318)                          | -0.04 (0.8021)                                 |
| SARS-CoV-2 spike-specific IgG         | µg/mL   | 40 | 0.30 (0.0605)              | 0.37 (0.0197)              | 0.64 (0.2790)                          | 0.09 (0.5779)                                  |
| SARS-CoV-2 RBD-specific IgG           | µg/mL   | 40 | 0.28 (0.0849)              | 0.45 (0.0035)              | 0.69 (0.4522)                          | 0.16 (0.3359)                                  |
| SARS-CoV-2 nucleoprotein-specific IgG | µg/mL   | 40 | 0.28 (0.0830)              | 0.39 (0.0126)              | 0.47 (0.0415)                          | -0.13 (0.4096)                                 |
| Tetanus toxoid-specific IgG           | µg/mL   | 40 | 0.10 (0.5381)              | -0.14 (0.3853)             | 0.85 (0.8166)                          | -0.12 (0.4576)                                 |

704 <sup>1</sup>Spearman's rank correlation coefficient

705 <sup>2</sup>fold-difference indicates the geometric mean value in females/males

706 <sup>3</sup>fold-difference indicates the geometric mean value in volunteers/males

707 **Figure 1.** Boxplots of SARS-CoV-2 neutralization and binding antibody concentration for 40  
708 plasma samples from 40 COVID-19 convalescent patients. (A) ND50 and (B) ND80  
709 neutralization titer measured using five SARS-CoV-2 neutralization assays. Each assay  
710 defined its own lower limit of detect (LOD) based on the initial dilution: 50-fold for SARS-CoV-  
711 2/VeroE6, 20 for the LV and VSV pseudovirus assays and 10 for the sVNT. Data below the  
712 LOD (open triangle) is plotted at LOD/2. Number and percent of samples above the LOD is  
713 indicated above each plot. (C) Antigen-specific IgG concentration measured using a Luminex  
714 bead-based assay. (D) Index values for each sample from the Abbott Architect nucleoprotein  
715 IgG assay. For each assay the box represents the extend of the inter-quartile range (IQR) with  
716 a line indicating the median; whiskers extend to 1.5 times the IQR.

717

718 **Figure 2.** Correlation among assay readouts measuring neutralization or antigen-specific IgG  
719 concentration in plasma. Heatmap color is determined by the Pearson's correlation coefficient  
720 ( $r$ , annotations). Each panel includes either ND50 titers (A) or ND80 titers (B) and their  
721 correlation with sVNT % neutralization, SARS-CoV-2 specific IgG concentration (Luminex  
722 bead-based assay), the quantitative index of the Abbott nucleoprotein assay and tetanus  
723 toxoid-specific IgG concentration.

724

725 **Figure 3.** Correlation analysis of plasma neutralizing potency and age of participants. A, ND50  
726 versus age; B, ND80 versus age.

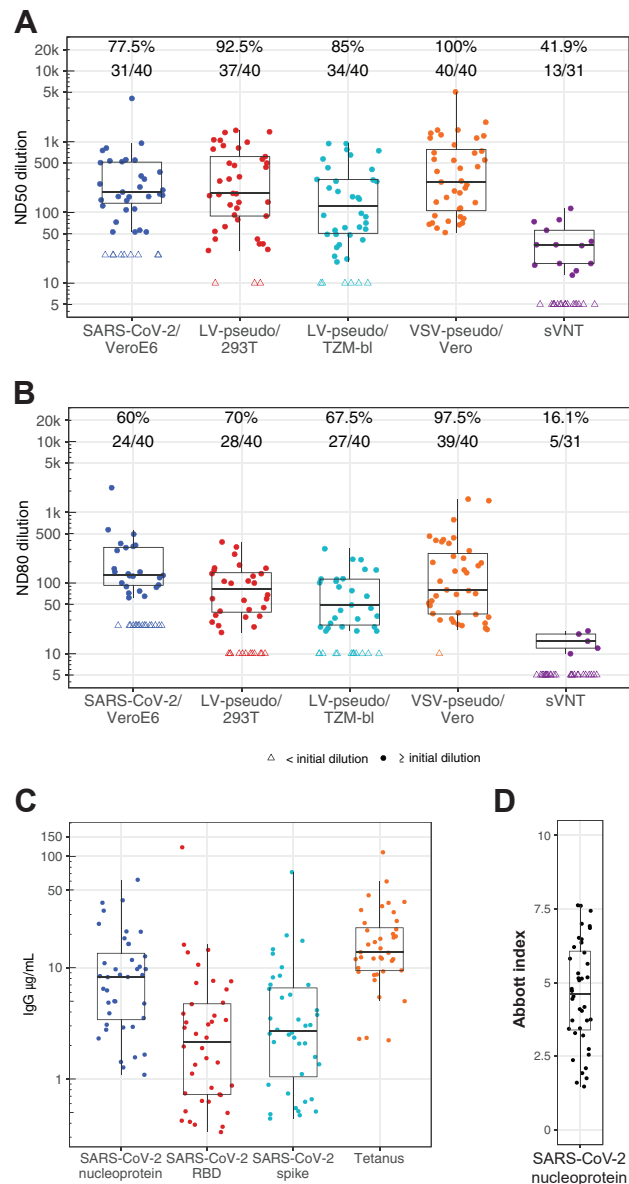

Figure 1. Boxplots of SARS-CoV-2 neutralization and binding antibody concentration for 40 plasma samples from 40 COVID-19 convalescent patients. (A) ND50 and (B) ND80 neutralization titer measured using five SARS-CoV-2 neutralization assays. Each assay defined its own lower limit of detect (LOD) based on the initial dilution: 50-fold for SARS-CoV-2/VeroE6, 20 for the LV and VSV pseudovirus assays and 10 for the svNT. Data below the LOD (open triangle) is plotted at LOD/2. Number and percent of samples above the LOD is indicated above each plot. (C) Antigen-specific IgG concentration measured using a Luminex bead-based assay. (D) Index values for each sample from the Abbott Architect nucleoprotein IgG assay. For each assay the box represents the extend of the inter-quartile range (IQR) with a line indicating the median; whiskers extend to 1.5 times the IQR.

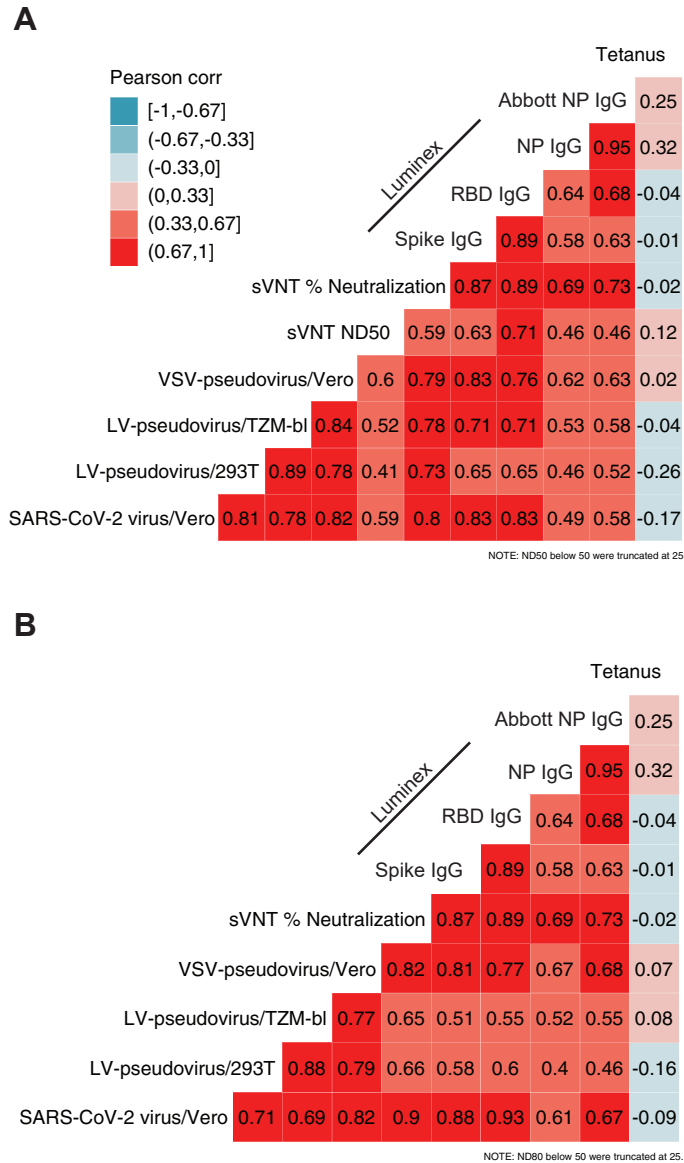

Figure 2. Correlation among assay readouts measuring neutralization or antigen-specific IgG concentration in plasma. Heatmap color is determined by the Pearson's correlation coefficient ( $r$ , annotations). Each panel includes either ND50 titers (A) or ND80 titers (B) and their correlation with sVNT % neutralization, SARS-CoV-2 specific IgG concentration (Luminex bead-based assay), the quantitative index of the Abbott nucleoprotein assay and tetanus toxoid-specific IgG concentration.

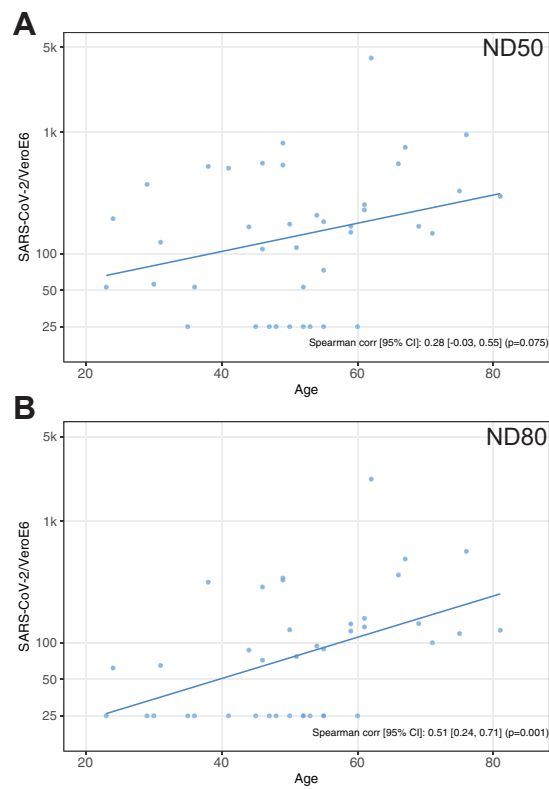

Figure 3. Correlation analysis of plasma neutralizing potency and age of participants. A, ND50 versus age; B, ND80 versus age.
