# Supplementary material for: Evaluation of SARS-CoV-2 neutralization assays for antibody monitoring in natural infection and vaccine trials
Source: bioRxiv or medRxiv preprint supplement (doi:10.1101/2020.12.07.20245431), 2020-12-08
Supplement: Supplementary file [file media-1.pdf]

1 **Evaluation of SARS-CoV-2 neutralization assays for antibody monitoring in natural infection and**  
2 **vaccine trials**

3

4 Anton M. Sholukh<sup>1\*#</sup>, Andrew Fiore-Gartland<sup>1\*</sup>, Emily S. Ford<sup>1,3</sup>, Yixuan J. Hou<sup>5</sup>, Victor Tse<sup>5</sup>, Hannah  
5 Kaiser<sup>7</sup>, Arnold Park<sup>7</sup>, Florian A. Lempp<sup>7</sup>, Russell Saint Germain<sup>1</sup>, Emily Bossard<sup>1</sup>, Jia Jin Kee<sup>1</sup>, Kurt  
6 Diem<sup>4</sup>, Andrew B. Stuart<sup>1</sup>, Peter B. Rupert<sup>2</sup>, Chance Brock<sup>2</sup>, Matthew Buerger<sup>2</sup>, Margaret K. Doll<sup>10</sup>, April  
7 Kaur Randhawa<sup>1</sup>, Leonidas Stamatatos<sup>1</sup>, Roland K. Strong<sup>1,2</sup>, Colleen McLaughlin<sup>10</sup>, Keith R.  
8 Jerome<sup>1,4</sup>, Ralph S. Baric<sup>5,6</sup>, David Montefiori<sup>8,9</sup>, and Lawrence Corey<sup>1,3,4#</sup>

9

10 **Supplementary materials**

11

## 12 Supplementary Table 1. Symptoms reported by study participants

| <b>Symptom</b>           | <b>Yes</b> | <b>No</b> | <b>Missing</b> | <b>Percent reporting symptom</b> |
|--------------------------|------------|-----------|----------------|----------------------------------|
| <b>fever</b>             | 23         | 11        | 6              | 57.5                             |
| <b>chills</b>            | 26         | 10        | 4              | 65                               |
| <b>fatigue</b>           | 35         | 4         | 1              | 87.5                             |
| <b>myalgia</b>           | 27         | 9         | 4              | 67.5                             |
| <b>sore throat</b>       | 20         | 14        | 6              | 50                               |
| <b>cough</b>             | 29         | 6         | 5              | 72.5                             |
| <b>rhinorrhea</b>        | 24         | 10        | 6              | 60                               |
| <b>dyspnea</b>           | 22         | 13        | 5              | 55                               |
| <b>wheezing</b>          | 6          | 19        | 15             | 15                               |
| <b>chest pain</b>        | 13         | 16        | 11             | 32.5                             |
| <b>other respiratory</b> | 8          | 17        | 15             | 20                               |
| <b>headache</b>          | 27         | 8         | 5              | 67.5                             |
| <b>nausea</b>            | 9          | 18        | 13             | 22.5                             |
| <b>abdominal pain</b>    | 6          | 20        | 14             | 15                               |
| <b>diarrhea</b>          | 14         | 16        | 10             | 35                               |
| <b>loss senses</b>       | 26         | 8         | 6              | 65                               |
| <b>eye pain</b>          | 7          | 19        | 14             | 17.5                             |
| <b>rash feet</b>         | 2          | 21        | 17             | 5                                |
| <b>rash body</b>         | 4          | 21        | 15             | 10                               |

13

14 **A**

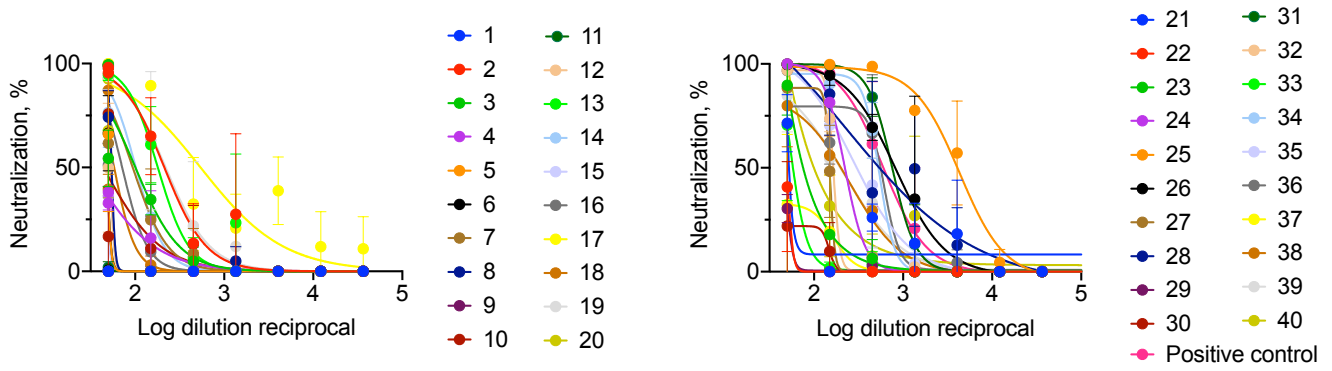

15

16 **B**

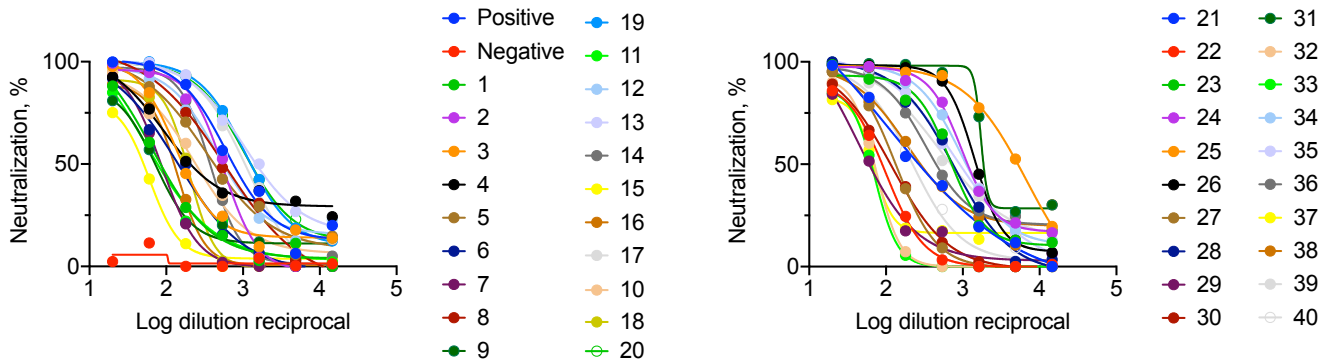

17

18

19 Supplementary Figure 1. Neutralizing antibody assay with SARS-CoV-2-nLuc in Vero E6 cells (A) and  
20 with PsVSV-Luc-D19 in Vero cells (B).

21

22

23

24 **A**

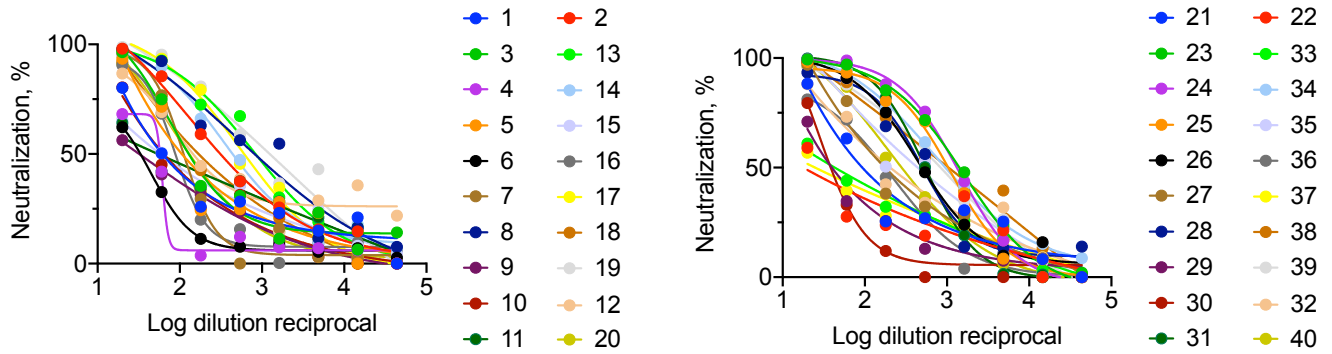

25

26 **B**

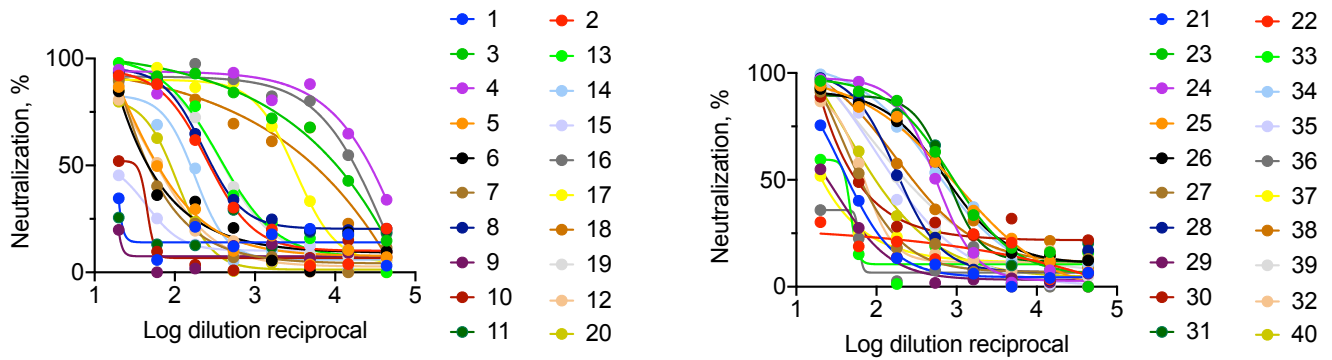

27

28

29 Supplementary Figure 2. Neutralizing antibody assay with LV-pseudovirus in 293T/ACE2 cells (A) and

30 with LV-pseudovirus in T2M-bl/ACE2/TMPRSS2 cells (B).

31 **A**

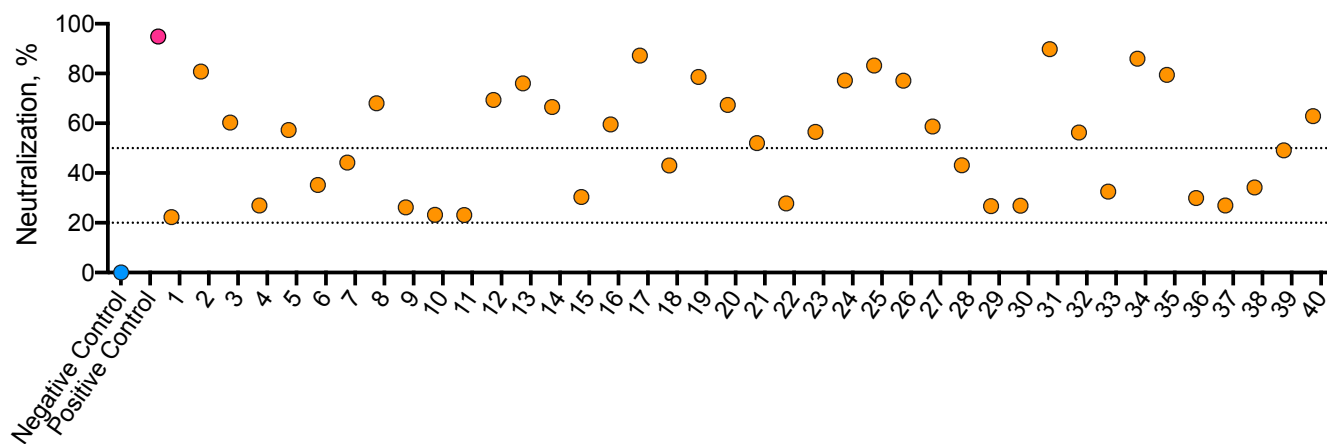

32

33

34 **B**

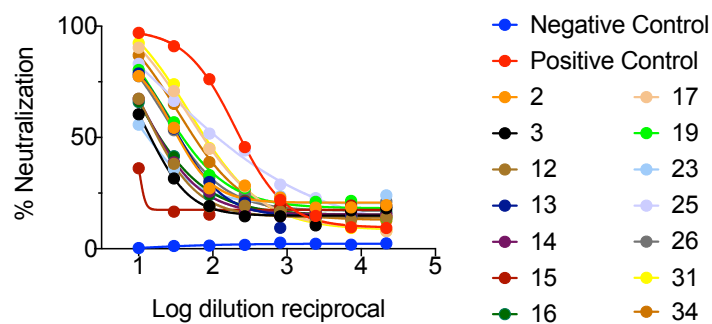

35

36 Supplementary Figure 3. Surrogate virus neutralization test from GenScript. A, samples tested in 1:10

37 dilution as per manufacturer protocol. Dotted lines show 50 and 20% neutralization, respectively.

38 Twenty percent is suggested as positivity cutoff by the manufacturer; B, plasma samples were titrated

39 2-fold starting at 1:10 to impute ND50 titers.

40

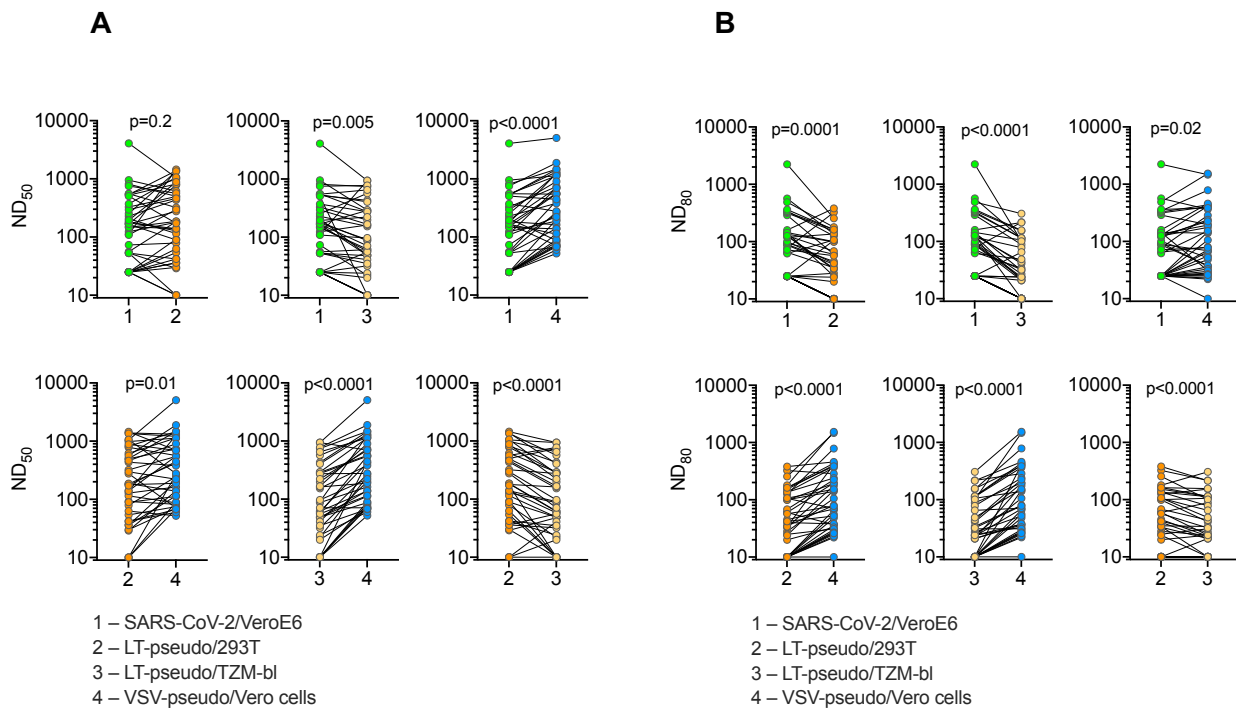

41

42 Supplementary Figure 4. Comparison of ND50 (A) and ND80 (B) titers measured in cell-based assays

43

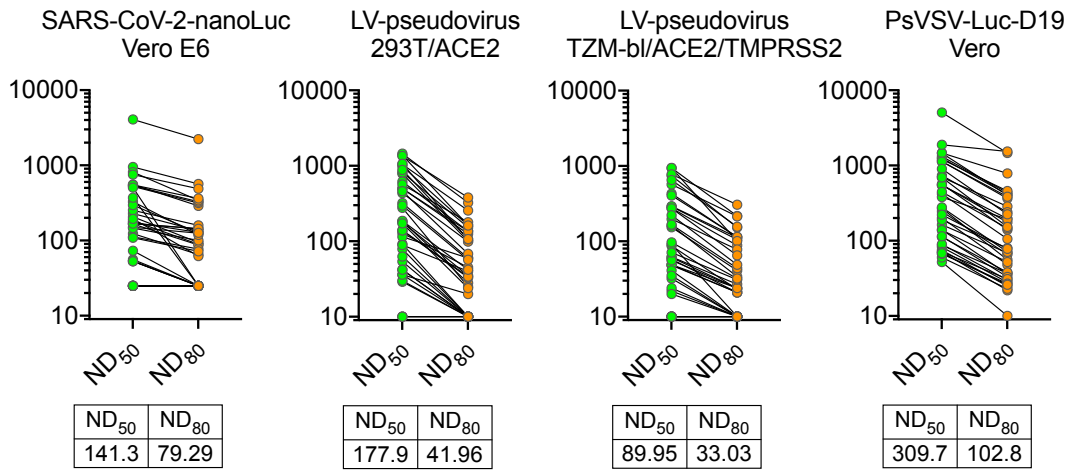

44

45 Supplementary Figure 5. Pseudovirus assays but not live virus assay allows reliable ND80  
 46 measurement. Geometric mean ND50 and ND80 for the corresponding assay are shown underneath  
 47 each graph

48 Supplementary Table 2. Fold change between ND50 and ND80 values

| <b>Neutralization</b> | <b>Mean ND fold change [95% CI]</b> | <b>P-value</b> |
|-----------------------|-------------------------------------|----------------|
| SARS-CoV-2/Vero E6    | 1.954 [1.62, 2.29]                  | <0.0001        |
| LV-pseudovirus/293T   | 4.573 [3.65, 5.5]                   | <0.0001        |
| LV-pseudovirus/TZM-bl | 4.478 [3.48, 5.48]                  | <0.0001        |
| PsVSV-Luc-D19/Vero    | 2.967 [2.7, 3.24]                   | <0.0001        |

49

50



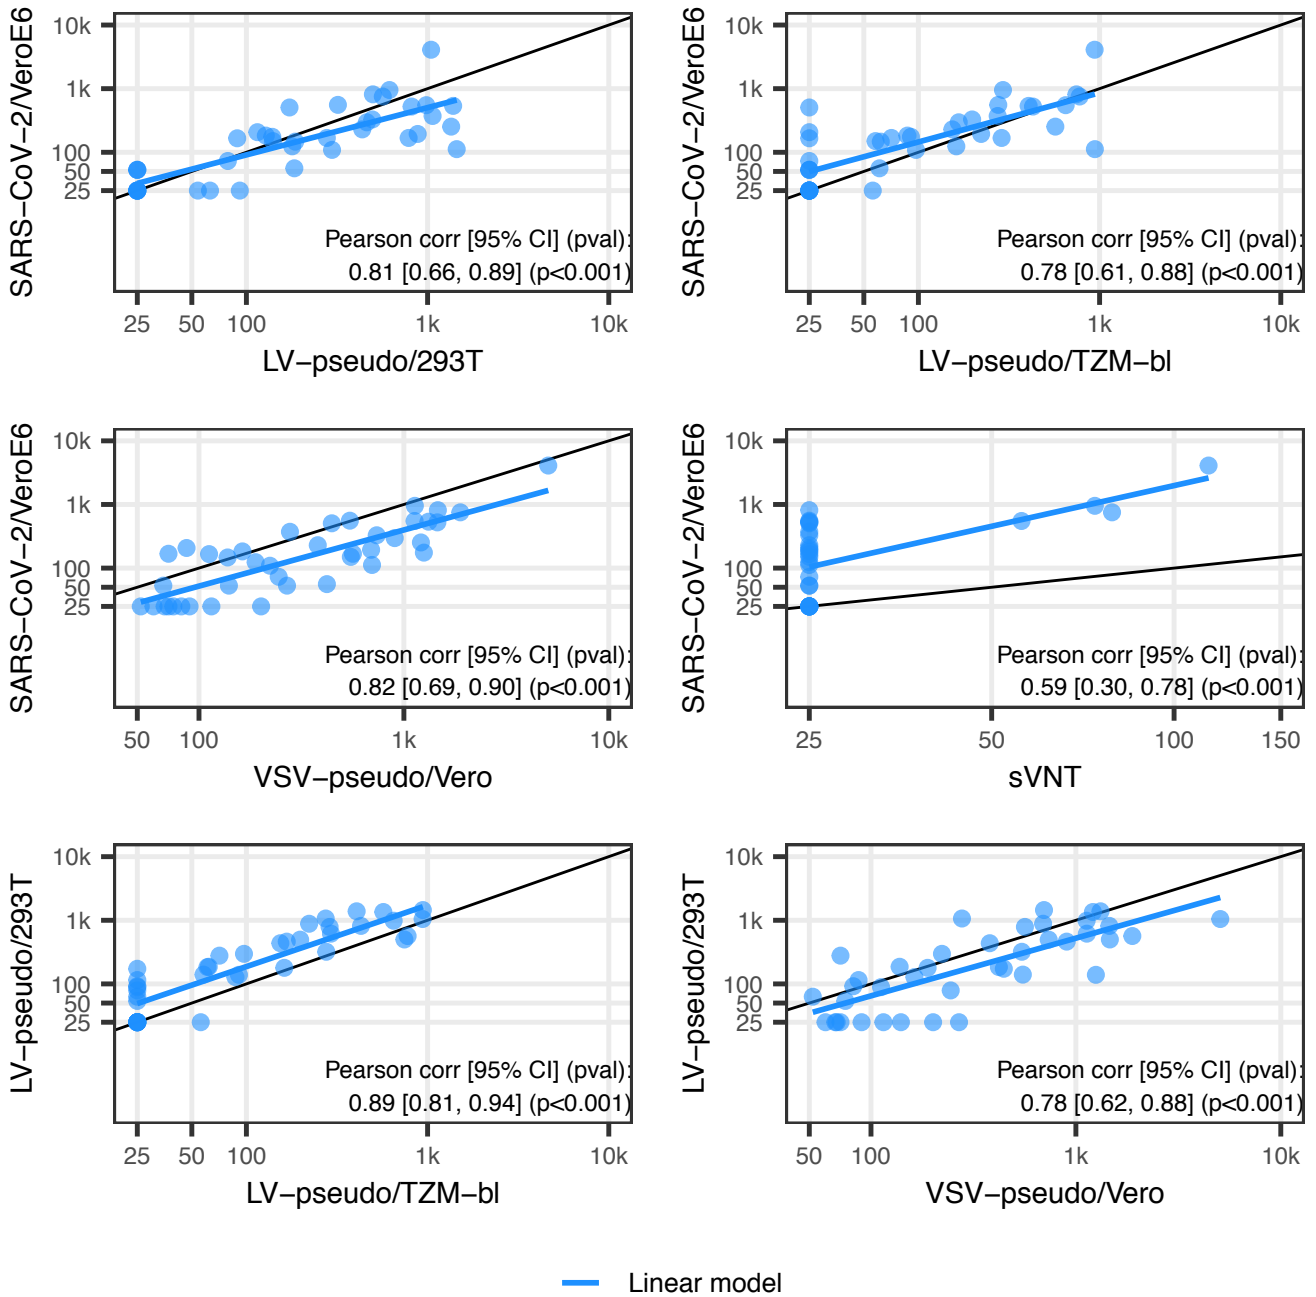

52

53

54 Supplementary Figure 6. Pearson correlation model analysis of ND50 titers among neutralization  
 55 assays.

56

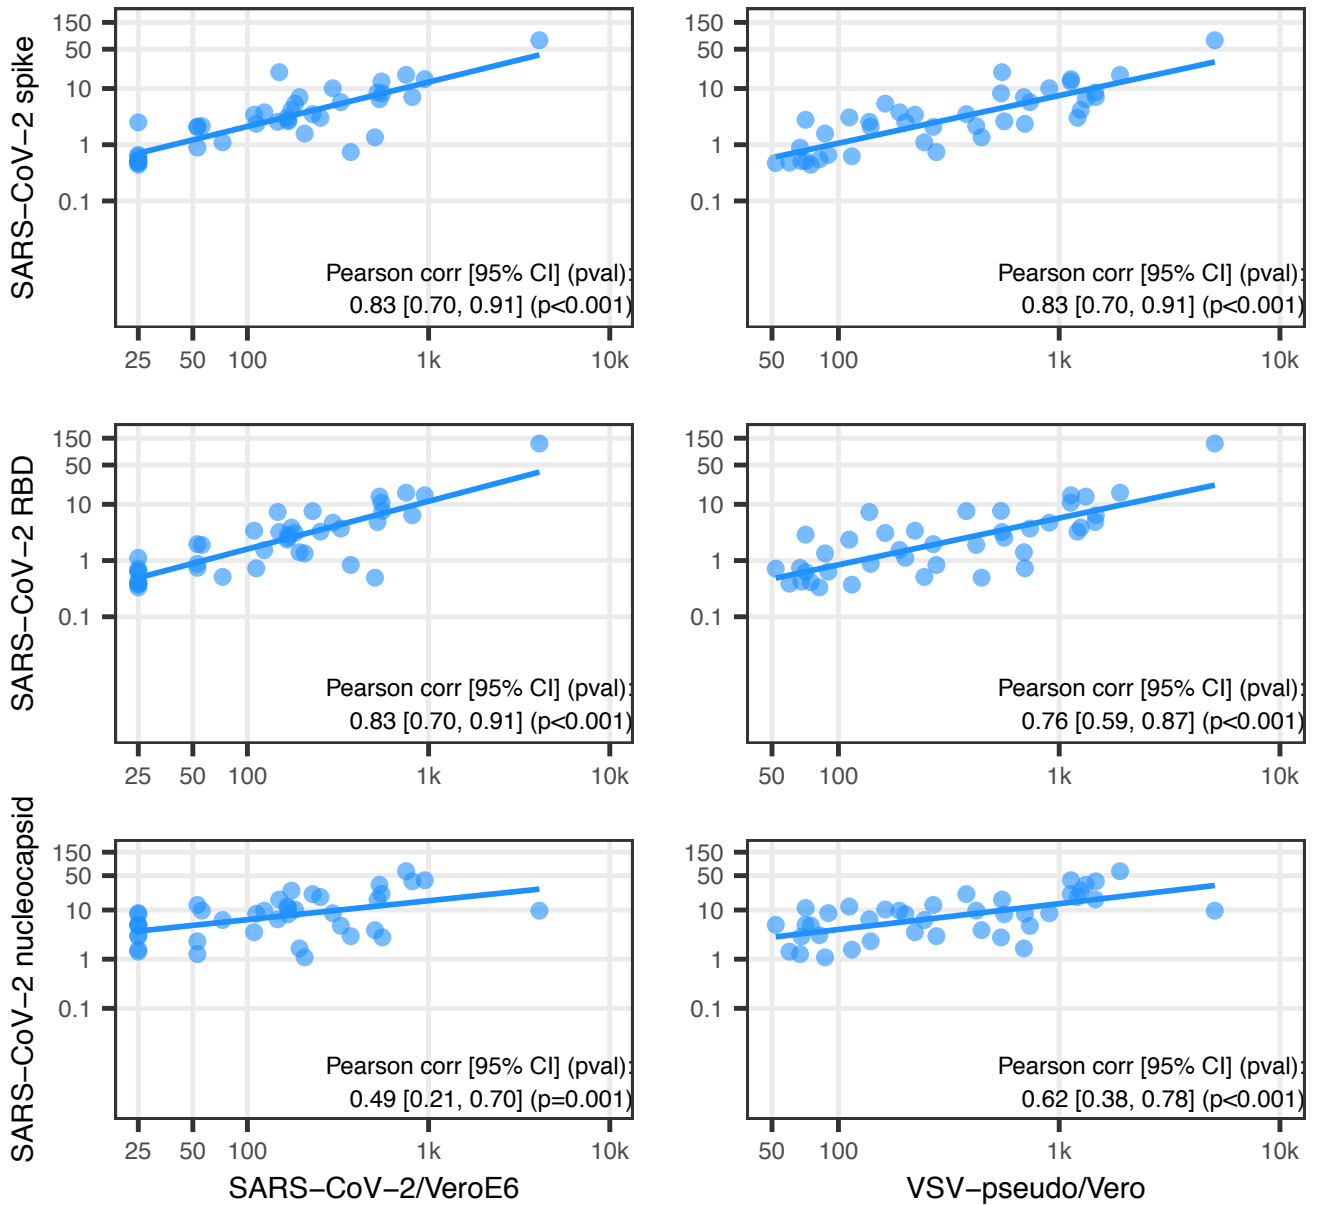

— Linear model

57

58 Supplementary Figure 7. Pearson correlation model analysis of ND50 titers vs SARS-CoV-2 specific

59 IgG concentration in plasma samples.
